# Supplementary material for: Why lanthanide ErIII SIMs cannot possess huge energy barriers: a theoretical investigation
Source: Royal Society of Chemistry journal article supplement (doi:10.1039/d0dt02868a), 2020-01-01
Supplement: d0dt02868a1.pdf [file d0dt02868a1.pdf]

## Supporting Information

### Why Lanthanide Er<sup>III</sup> SIMs cannot Possess Huge Energy

### Barriers: A Theoretical Investigation

Fang Lu, Man-Man Ding, Jia-Xin Li, Bao-Lin Wang, and Yi-Quan Zhang\*

*Jiangsu Key Lab for NSLSCS, School of Physical Science and Technology, Nanjing Normal University, Nanjing 210023, P. R. China*

**Table S1.** Calculated crystal field parameters of complexes **1–3** by CASSCF/RASSI-SO using CASSCF/RASSI-SO with MOLCAS 8.4.

| <i>k</i> | <i>q</i>                 | <b>1</b>                 | <b>2</b>                 | <b>3</b>                 |
|----------|--------------------------|--------------------------|--------------------------|--------------------------|
|          |                          | <i>B(k, q)</i>           |                          |                          |
| 2        | -2                       | $-0.6513 \times 10^{-3}$ | 0.2672                   | $-0.2076 \times 10^{-2}$ |
|          | -1                       | $0.1693 \times 10^{-1}$  | 0.3437                   | $0.4190 \times 10^{-1}$  |
|          | 0                        | $-0.3052 \times 10^1$    | $-0.3713 \times 10^1$    | $-0.2132 \times 10^1$    |
|          | 1                        | $-0.5389 \times 10^{-1}$ | $0.5334 \times 10^{-1}$  | $-0.2480 \times 10^{-2}$ |
|          | 2                        | $-0.9171 \times 10^{-2}$ | 0.2402                   | $0.2405 \times 10^{-2}$  |
| 4        | -4                       | $0.2965 \times 10^{-3}$  | $0.3783 \times 10^{-2}$  | $0.6064 \times 10^{-4}$  |
|          | -3                       | $0.6510 \times 10^{-1}$  | $0.1145 \times 10^{-1}$  | $-0.5133 \times 10^{-1}$ |
|          | -2                       | $-0.2498 \times 10^{-4}$ | $0.4954 \times 10^{-3}$  | $-0.8158 \times 10^{-5}$ |
|          | -1                       | $-0.4655 \times 10^{-4}$ | $-0.1448 \times 10^{-2}$ | $-0.8354 \times 10^{-4}$ |
|          | 0                        | $0.1269 \times 10^{-2}$  | $0.2681 \times 10^{-2}$  | $-0.7049 \times 10^{-4}$ |
|          | 1                        | $0.2239 \times 10^{-3}$  | $0.3858 \times 10^{-3}$  | $0.8678 \times 10^{-5}$  |
|          | 2                        | $0.6390 \times 10^{-4}$  | $-0.2706 \times 10^{-3}$ | $-0.5762 \times 10^{-4}$ |
|          | 3                        | $-0.2021 \times 10^{-1}$ | $-0.4705 \times 10^{-1}$ | $-0.8118 \times 10^{-2}$ |
| 4        | $0.3105 \times 10^{-5}$  | $0.8271 \times 10^{-3}$  | $-0.2598 \times 10^{-3}$ |                          |
| 6        | -6                       | $0.2040 \times 10^{-3}$  | $0.1379 \times 10^{-3}$  | $0.2399 \times 10^{-3}$  |
|          | -5                       | $-0.8209 \times 10^{-5}$ | $-0.7424 \times 10^{-4}$ | $0.1021 \times 10^{-4}$  |
|          | -4                       | $-0.1989 \times 10^{-5}$ | $-0.3237 \times 10^{-4}$ | $-0.1431 \times 10^{-5}$ |
|          | -3                       | $-0.4566 \times 10^{-3}$ | $0.7310 \times 10^{-4}$  | $0.3960 \times 10^{-3}$  |
|          | -2                       | $0.2428 \times 10^{-5}$  | $-0.3512 \times 10^{-4}$ | $-0.2054 \times 10^{-5}$ |
|          | -1                       | $0.3069 \times 10^{-6}$  | $0.3375 \times 10^{-5}$  | $0.4820 \times 10^{-6}$  |
|          | 0                        | $-0.3248 \times 10^{-5}$ | $-0.2872 \times 10^{-4}$ | $0.4245 \times 10^{-5}$  |
|          | 1                        | $-0.2251 \times 10^{-5}$ | $-0.2103 \times 10^{-4}$ | $0.1384 \times 10^{-6}$  |
|          | 2                        | $-0.3013 \times 10^{-5}$ | $0.2323 \times 10^{-4}$  | $0.3327 \times 10^{-5}$  |
|          | 3                        | $0.2399 \times 10^{-3}$  | $0.9674 \times 10^{-4}$  | $0.2589 \times 10^{-3}$  |
|          | 4                        | $0.1024 \times 10^{-5}$  | $-0.3777 \times 10^{-4}$ | $0.1800 \times 10^{-5}$  |
|          | 5                        | $0.1370 \times 10^{-4}$  | $-0.2559 \times 10^{-3}$ | $0.9634 \times 10^{-5}$  |
| 6        | $-0.2288 \times 10^{-3}$ | $0.3759 \times 10^{-4}$  | $-0.2714 \times 10^{-3}$ |                          |

**Table S2.** Calculated energy levels ( $\text{cm}^{-1}$ ),  $\mathbf{g}$  ( $g_x, g_y, g_z$ ) tensors and predominant  $m_J$  values of the lowest eight Kramers doublets (KDs) for **1** with the different included  $\theta$  angles (degree) keeping the Er-N bond lengths ( $\text{\AA}$ ) fixed using CASSCF/RASSI-SO with MOLCAS 8.4.

| $\theta$<br>KDs | 60°                |                          |            | 65°                |                          |            | 70°                |                          |            |
|-----------------|--------------------|--------------------------|------------|--------------------|--------------------------|------------|--------------------|--------------------------|------------|
|                 | $E/\text{cm}^{-1}$ | $\mathbf{g}$             | $m_J$      | $E/\text{cm}^{-1}$ | $\mathbf{g}$             | $m_J$      | $E/\text{cm}^{-1}$ | $\mathbf{g}$             | $m_J$      |
| 1               | 0.0                | 0.002<br>0.003<br>17.701 | $\pm 15/2$ | 0.0                | 0.001<br>0.001<br>17.897 | $\pm 15/2$ | 0.0                | 0.000<br>0.000<br>17.893 | $\pm 15/2$ |
| 2               | 10.5               | 0.064<br>0.069<br>15.063 | $\pm 13/2$ | 30.0               | 0.142<br>0.143<br>15.367 | $\pm 13/2$ | 66.2               | 0.145<br>0.146<br>15.454 | $\pm 13/2$ |
| 3               | 82.0               | 0.328<br>0.343<br>11.204 | $\pm 11/2$ | 114.6              | 0.211<br>0.218<br>12.223 | $\pm 11/2$ | 155.0              | 0.161<br>0.164<br>12.609 | $\pm 11/2$ |
| 4               | 127.1              | 0.552<br>0.571<br>7.050  | $\pm 9/2$  | 177.3              | 0.139<br>0.150<br>8.341  | $\pm 9/2$  | 228.5              | 0.062<br>0.069<br>9.315  | $\pm 9/2$  |
| 5               | 134.8              | 8.976<br>7.853<br>1.683  | $\pm 1/2$  | 204.8              | 8.275<br>7.995<br>3.054  | $\pm 5/2$  | 276.9              | 7.302<br>7.180<br>4.495  | $\pm 7/2$  |
| 6               | 253.9              | 8.317<br>7.569<br>1.889  | $\pm 3/2$  | 320.4              | 8.099<br>7.731<br>1.448  | $\pm 3/2$  | 387.6              | 7.207<br>7.035<br>2.396  | $\pm 3/2$  |
| 7               | 265.0              | 0.064<br>0.780<br>6.511  | $\pm 7/2$  | 343.3              | 0.086<br>0.541<br>5.239  | $\pm 7/2$  | 430.3              | 0.138<br>0.377<br>4.433  | $\pm 5/2$  |
| 8               | 277.5              | 8.752<br>7.878<br>2.319  | $\pm 5/2$  | 364.2              | 9.358<br>8.596<br>1.229  | $\pm 1/2$  | 460.8              | 9.520<br>8.902<br>1.030  | $\pm 1/2$  |
| $\theta$<br>KDs | 74.8°              |                          |            | 80°                |                          |            | 85°                |                          |            |
|                 | $E/\text{cm}^{-1}$ | $\mathbf{g}$             | $m_J$      | $E/\text{cm}^{-1}$ | $\mathbf{g}$             | $m_J$      | $E/\text{cm}^{-1}$ | $\mathbf{g}$             | $m_J$      |
| 1               | 0.0                | 0.000<br>0.000<br>17.881 | $\pm 15/2$ | 0.0                | 0.000<br>0.000<br>17.881 | $\pm 15/2$ | 0.0                | 0.000<br>0.000<br>17.881 | $\pm 15/2$ |
| 2               | 109.4              | 0.137<br>0.137<br>15.477 | $\pm 13/2$ | 155.3              | 0.129<br>0.129<br>15.479 | $\pm 13/2$ | 191.5              | 0.122<br>0.122<br>15.470 | $\pm 13/2$ |
| 3               | 196.6              | 0.134<br>0.134<br>12.803 | $\pm 11/2$ | 237.9              | 0.117<br>0.117<br>12.927 | $\pm 11/2$ | 270.3              | 0.109<br>0.110<br>13.000 | $\pm 11/2$ |
| 4               | 272.6              | 0.024<br>0.029<br>9.923  | $\pm 9/2$  | 310.6              | 0.024<br>0.028<br>10.298 | $\pm 9/2$  | 338.4              | 0.019<br>0.023<br>10.486 | $\pm 9/2$  |

|          |                    |                          |            |       |                         |           |       |                         |           |
|----------|--------------------|--------------------------|------------|-------|-------------------------|-----------|-------|-------------------------|-----------|
| 5        | 338.6              | 5.988<br>5.942<br>5.871  | $\pm 7/2$  | 390.1 | 4.628<br>4.675<br>6.914 | $\pm 7/2$ | 425.6 | 3.919<br>3.955<br>7.397 | $\pm 7/2$ |
| 6        | 448.9              | 5.975<br>5.879<br>3.637  | $\pm 3/2$  | 506.1 | 4.613<br>4.648<br>4.698 | $\pm 5/2$ | 549.9 | 3.959<br>3.988<br>5.047 | $\pm 5/2$ |
| 7        | 512.5              | 0.128<br>0.238<br>3.957  | $\pm 5/2$  | 589.6 | 0.191<br>0.240<br>3.676 | $\pm 3/2$ | 648.3 | 0.191<br>0.220<br>3.549 | $\pm 3/2$ |
| 8        | 553.0              | 9.556<br>9.146<br>1.058  | $\pm 1/2$  | 640.9 | 9.673<br>9.217<br>1.109 | $\pm 1/2$ | 708.7 | 9.704<br>9.282<br>1.136 | $\pm 1/2$ |
| $\theta$ | 90°                |                          |            |       |                         |           |       |                         |           |
| KDs      | $E/\text{cm}^{-1}$ | $g$                      | $m_J$      |       |                         |           |       |                         |           |
| 1        | 0.0                | 0.000<br>0.000<br>17.866 | $\pm 15/2$ |       |                         |           |       |                         |           |
| 2        | 212.6              | 0.113<br>0.113<br>15.455 | $\pm 13/2$ |       |                         |           |       |                         |           |
| 3        | 291.6              | 0.102<br>0.103<br>13.039 | $\pm 11/2$ |       |                         |           |       |                         |           |
| 4        | 358.2              | 0.013<br>0.017<br>10.565 | $\pm 9/2$  |       |                         |           |       |                         |           |
| 5        | 448.2              | 3.874<br>3.900<br>7.489  | $\pm 7/2$  |       |                         |           |       |                         |           |
| 6        | 579.9              | 3.891<br>3.920<br>5.093  | $\pm 5/2$  |       |                         |           |       |                         |           |
| 7        | 686.8              | 0.159<br>0.208<br>3.526  | $\pm 3/2$  |       |                         |           |       |                         |           |
| 8        | 753.0              | 9.697<br>9.323<br>1.140  | $\pm 1/2$  |       |                         |           |       |                         |           |

**Table S3.** Wave functions with definite projection of the total moments  $|m_J\rangle$  for the lowest two KDs for **1** with the different included  $\theta$  angles (degree) keeping the Er-N bond lengths ( $\text{\AA}$ ) fixed using CASSCF/RASSI-SO with MOLCAS 8.4.

| $\theta$ | $E/\text{cm}^{-1}$ | wave functions                                     |
|----------|--------------------|----------------------------------------------------|
| 60°      | 0.0                | 97.45% $ \pm 15/2\rangle$ +2.08% $ \pm 9/2\rangle$ |

|       |       |                                                   |
|-------|-------|---------------------------------------------------|
|       | 10.5  | $94.59\% \pm 13/2\rangle + 4.36\% \pm 7/2\rangle$ |
| 65°   | 0.0   | $99.82\% \pm 15/2\rangle$                         |
|       | 30.0  | $99.22\% \pm 13/2\rangle$                         |
| 70°   | 0.0   | $99.75\% \pm 15/2\rangle$                         |
|       | 66.2  | $99.34\% \pm 13/2\rangle$                         |
| 74.8° | 0.0   | $99.59\% \pm 15/2\rangle$                         |
|       | 109.4 | $99.69\% \pm 13/2\rangle$                         |
| 80°   | 0.0   | $99.61\% \pm 15/2\rangle$                         |
|       | 155.3 | $99.77\% \pm 13/2\rangle$                         |
| 85°   | 0.0   | $99.62\% \pm 15/2\rangle$                         |
|       | 191.5 | $99.70\% \pm 13/2\rangle$                         |
| 90°   | 0.0   | $99.42\% \pm 15/2\rangle$                         |
|       | 212.6 | $99.53\% \pm 13/2\rangle$                         |

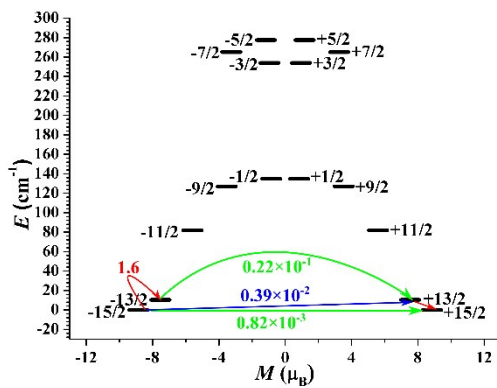

60°

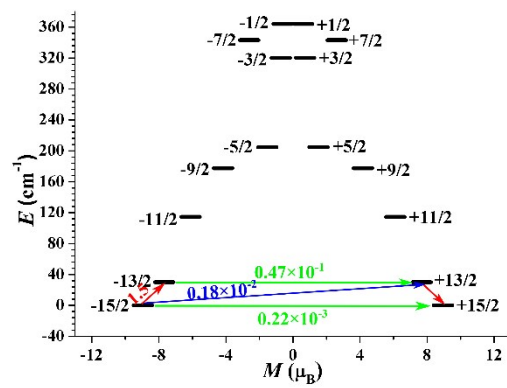

65°

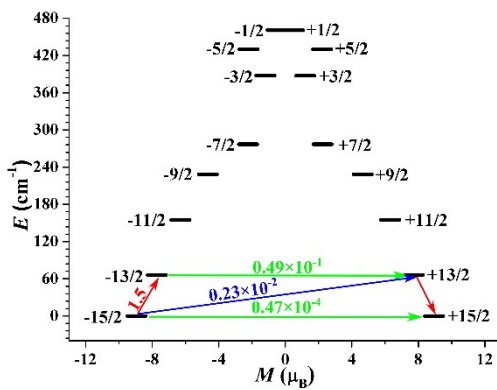

70°

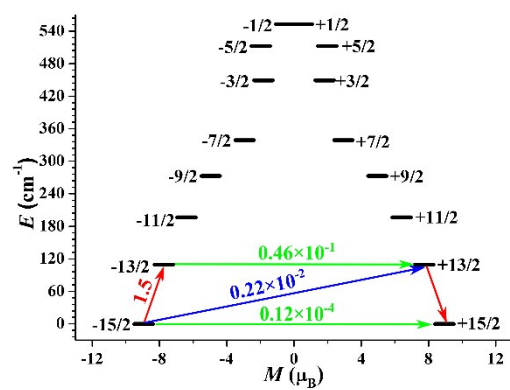

74.8°

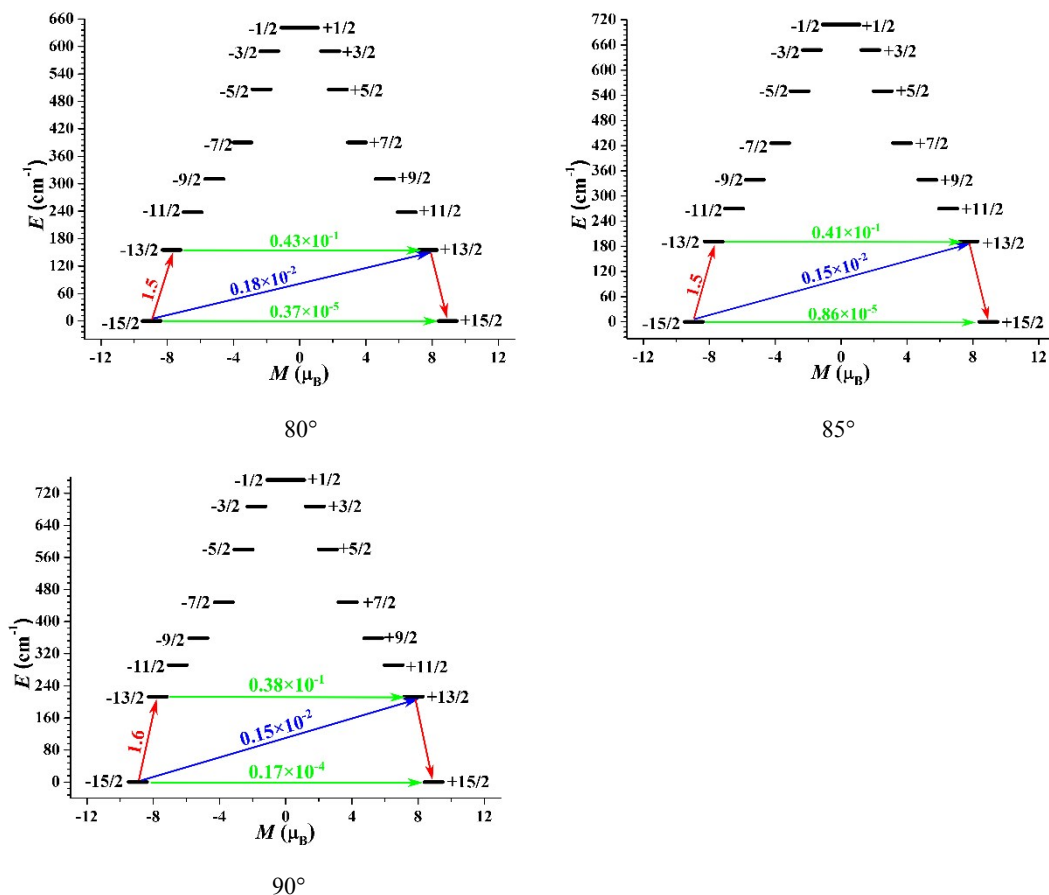

**Figure S1.** Magnetization blocking barriers for **1** with the different included  $\theta$  angles keeping Er-N bond lengths fixed. The thick black lines represent the KDs as a function of their magnetic moments along the magnetic axes. The green lines correspond to diagonal matrix elements of their transversal magnetic moments; the blue lines represent Orbach relaxation processes. The path shown by the red arrows represent the most probable path for magnetic relaxation in the corresponding compounds. The numbers at each arrow stand for the mean absolute value of the corresponding matrix element of transition magnetic moment.

**Table S4.** Calculated energy levels (cm<sup>-1</sup>),  $\mathbf{g}$  ( $g_x, g_y, g_z$ ) tensors and predominant  $m_J$  values of the lowest eight KDs for **2** with the different included  $\theta$  angles (degree) keeping the Er-O bond lengths (Å) fixed using CASSCF/RASSI-SO with MOLCAS 8.4<sup>1</sup>.

| $\theta$<br>KDs | 60°                |                          |            | 65°                |                          |            | 70°                |                          |            |
|-----------------|--------------------|--------------------------|------------|--------------------|--------------------------|------------|--------------------|--------------------------|------------|
|                 | $E/\text{cm}^{-1}$ | $\mathbf{g}$             | $m_J$      | $E/\text{cm}^{-1}$ | $\mathbf{g}$             | $m_J$      | $E/\text{cm}^{-1}$ | $\mathbf{g}$             | $m_J$      |
| 1               | 0.0                | 0.005<br>0.006<br>17.845 | $\pm 15/2$ | 0.0                | 0.001<br>0.001<br>17.891 | $\pm 15/2$ | 0.0                | 0.001<br>0.001<br>17.895 | $\pm 15/2$ |
| 2               | 84.4               | 0.073<br>0.087<br>15.196 | $\pm 13/2$ | 114.1              | 0.023<br>0.031<br>15.360 | $\pm 13/2$ | 143.5              | 0.012<br>0.017<br>15.411 | $\pm 13/2$ |
| 3               | 151.9              | 0.004<br>0.027<br>12.254 | $\pm 11/2$ | 187.6              | 0.027<br>0.036<br>12.644 | $\pm 11/2$ | 220.5              | 0.015<br>0.036<br>12.860 | $\pm 11/2$ |
| 4               | 211.2              | 1.879                    | $\pm 9/2$  | 254.4              | 1.186                    | $\pm 9/2$  | 291.9              | 0.760                    | $\pm 9/2$  |

|                 |                    |                          |            |                    |                          |            |                    |                          |            |
|-----------------|--------------------|--------------------------|------------|--------------------|--------------------------|------------|--------------------|--------------------------|------------|
|                 |                    | 1.989<br>9.266           |            |                    | 1.191<br>9.968           |            |                    | 0.777<br>10.355          |            |
| 5               | 267.7              | 6.991<br>5.808<br>3.292  | $\pm 7/2$  | 325.6              | 2.587<br>4.835<br>7.098  | $\pm 7/2$  | 375.7              | 2.081<br>3.555<br>7.702  | $\pm 7/2$  |
| 6               | 336.2              | 2.649<br>3.907<br>7.377  | $\pm 5/2$  | 406.9              | 5.894<br>4.849<br>1.517  | $\pm 5/2$  | 471.0              | 5.337<br>4.970<br>0.722  | $\pm 5/2$  |
| 7               | 375.5              | 1.806<br>4.488<br>8.636  | $\pm 3/2$  | 464.8              | 2.036<br>3.946<br>7.853  | $\pm 3/2$  | 545.8              | 2.326<br>3.559<br>7.571  | $\pm 3/2$  |
| 8               | 404.3              | 0.668<br>3.210<br>14.696 | $\pm 1/2$  | 504.6              | 0.808<br>3.923<br>14.372 | $\pm 1/2$  | 597.0              | 0.854<br>4.167<br>14.302 | $\pm 1/2$  |
| $\theta$<br>KDs | 75.7°              |                          |            | 80°                |                          |            | 85°                |                          |            |
|                 | $E/\text{cm}^{-1}$ | $g$                      | $m_J$      | $E/\text{cm}^{-1}$ | $g$                      | $m_J$      | $E/\text{cm}^{-1}$ | $g$                      | $m_J$      |
| 1               | 0.0                | 0.001<br>0.001<br>17.887 | $\pm 15/2$ | 0.0                | 0.001<br>0.001<br>17.879 | $\pm 15/2$ | 0.0                | 0.000<br>0.000<br>17.868 | $\pm 15/2$ |
| 2               | 167.7              | 0.019<br>0.021<br>15.427 | $\pm 13/2$ | 176.1              | 0.024<br>0.026<br>15.439 | $\pm 13/2$ | 181.7              | 0.028<br>0.030<br>15.463 | $\pm 13/2$ |
| 3               | 248.1              | 0.001<br>0.031<br>13.000 | $\pm 11/2$ | 259.9              | 0.003<br>0.036<br>13.063 | $\pm 11/2$ | 261.4              | 0.011<br>0.037<br>13.093 | $\pm 11/2$ |
| 4               | 323.6              | 0.467<br>0.496<br>10.580 | $\pm 9/2$  | 339.8              | 0.356<br>0.392<br>10.667 | $\pm 9/2$  | 349.0              | 0.275<br>0.312<br>10.700 | $\pm 9/2$  |
| 5               | 418.6              | 2.028<br>2.952<br>7.976  | $\pm 7/2$  | 440.8              | 2.138<br>2.832<br>8.031  | $\pm 7/2$  | 454.2              | 2.307<br>2.820<br>7.999  | $\pm 7/2$  |
| 6               | 527.9              | 5.496<br>4.704<br>0.369  | $\pm 5/2$  | 557.2              | 5.487<br>4.791<br>0.305  | $\pm 5/2$  | 573.9              | 5.440<br>4.955<br>0.298  | $\pm 5/2$  |
| 7               | 618.0              | 2.204<br>3.245<br>7.009  | $\pm 3/2$  | 653.3              | 2.888<br>3.138<br>8.052  | $\pm 3/2$  | 671.9              | 2.891<br>3.258<br>8.570  | $\pm 3/2$  |
| 8               | 677.7              | 0.921<br>4.747<br>13.889 | $\pm 1/2$  | 723.2              | 0.804<br>3.772<br>14.671 | $\pm 1/2$  | 746.3              | 0.740<br>3.350<br>14.972 | $\pm 1/2$  |
| $\theta$<br>KDs | 90°                |                          |            |                    |                          |            |                    |                          |            |
|                 | $E/\text{cm}^{-1}$ | $g$                      | $m_J$      |                    |                          |            |                    |                          |            |
| 1               | 0.0                | 0.001<br>0.001           | $\pm 15/2$ |                    |                          |            |                    |                          |            |

|   |       |                            |            |
|---|-------|----------------------------|------------|
|   |       | 17.862                     |            |
| 2 | 193.9 | 0.033<br>0.034<br>15.493   | $\pm 13/2$ |
| 3 | 251.1 | 0.023<br>0.034<br>13.085   | $\pm 11/2$ |
| 4 | 352.1 | 0.267<br>0.294<br>10.659   | $\pm 9/2$  |
| 5 | 454.8 | 2.405<br>2.863<br>7.896    | $\pm 7/2$  |
| 6 | 572.0 | 5.4360<br>5.0334<br>0.2783 | $\pm 5/2$  |
| 7 | 666.0 | 2.737<br>3.483<br>9.104    | $\pm 3/2$  |
| 8 | 740.5 | 0.670<br>2.928<br>15.245   | $\pm 1/2$  |

**Table S5.** Wave functions with definite projection of the total moments  $|m_J\rangle$  for the lowest two KDs for **2** with the different included  $\theta$  angles (degree) keeping the Er-O bond lengths ( $\text{\AA}$ ) fixed using CASSCF/RASSI-SO with MOLCAS 8.4.

| $\theta$ | $E/\text{cm}^{-1}$ | wave functions                                     |
|----------|--------------------|----------------------------------------------------|
| 60°      | 0.0                | 98.87% $ \pm 15/2\rangle$                          |
|          | 84.4               | 92.68% $ \pm 13/2\rangle$ +4.05% $ \pm 7/2\rangle$ |
| 65°      | 0.0                | 99.62% $ \pm 15/2\rangle$                          |
|          | 114.1              | 95.81% $ \pm 13/2\rangle$ +2.13% $ \pm 7/2\rangle$ |
| 70°      | 0.0                | 99.74% $ \pm 15/2\rangle$                          |
|          | 143.5              | 97.64% $ \pm 13/2\rangle$                          |
| 75.7°    | 0.0                | 99.71% $ \pm 15/2\rangle$                          |
|          | 167.7              | 98.82% $ \pm 13/2\rangle$                          |
| 80°      | 0.0                | 99.60% $ \pm 15/2\rangle$                          |
|          | 176.1              | 99.18% $ \pm 13/2\rangle$                          |
| 85°      | 0.0                | 99.46% $ \pm 15/2\rangle$                          |
|          | 181.7              | 99.24% $ \pm 13/2\rangle$                          |
| 90°      | 0.0                | 99.40% $ \pm 15/2\rangle$                          |
|          | 193.9              | 99.07% $ \pm 13/2\rangle$                          |

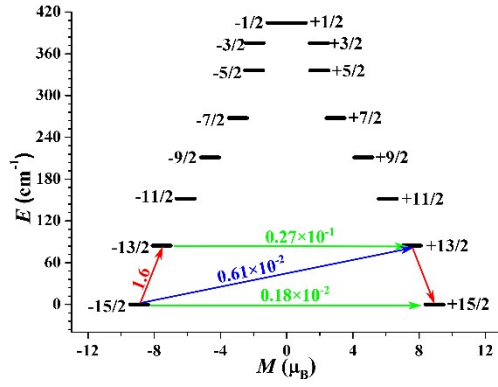

$60^\circ$

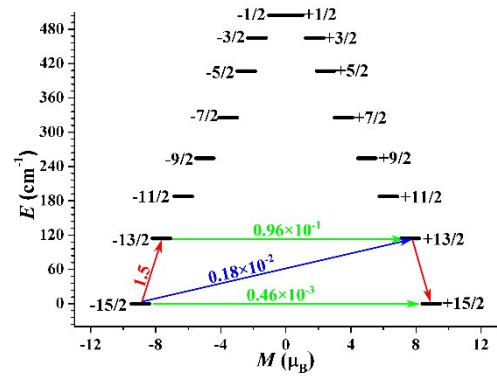

$65^\circ$

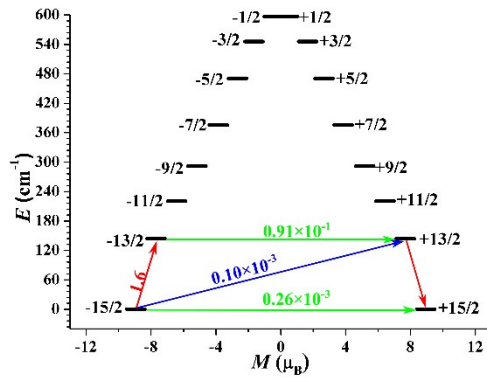

$70^\circ$

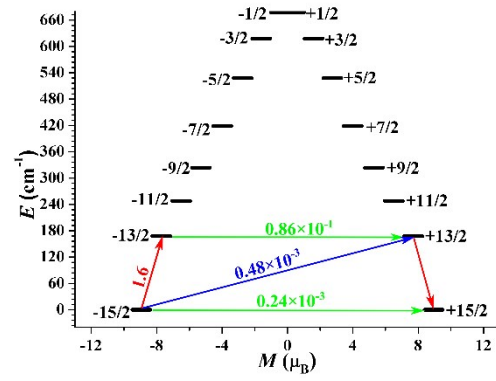

$75.7^\circ$

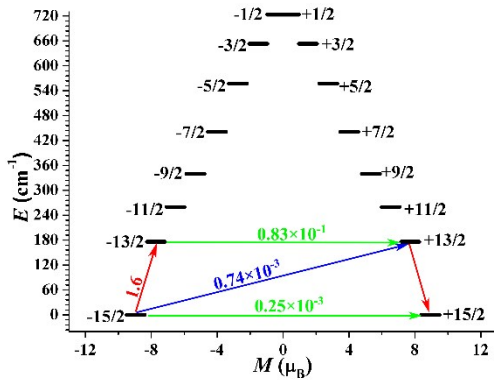

$80^\circ$

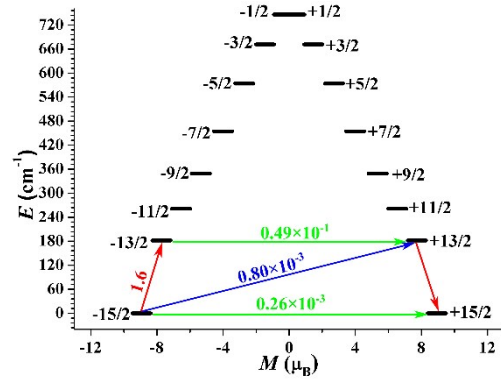

$85^\circ$

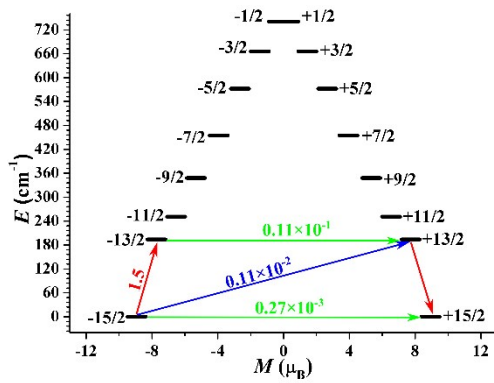

$90^\circ$



**Figure S2.** Magnetization blocking barriers for **2** with the different included  $\theta$  angles keeping the Er-O bond lengths fixed. The thick black lines represent the KDs as a function of their magnetic moments along the magnetic axes. The green lines correspond to diagonal matrix elements of their transversal magnetic moments; the blue lines represent Orbach relaxation processes. The path shown by the red arrows represent the most probable path for magnetic relaxation in the corresponding compounds. The numbers at each arrow stand for the mean absolute value of the corresponding matrix element of transition magnetic moment.

**Table S6.** Calculated energy levels ( $\text{cm}^{-1}$ ),  $\mathbf{g}$  ( $g_x, g_y, g_z$ ) tensors and predominant  $m_J$  values of the lowest eight KDs for **3** with the different included  $\theta$  angles (degree) keeping the Er-C bond lengths ( $\text{\AA}$ ) fixed using CASSCF/RASSI-SO with MOLCAS 8.4<sup>1</sup>.

| $\theta$<br>KDs | 60°                |                          |            | 65°                |                          |            | 69.3°              |                          |            |
|-----------------|--------------------|--------------------------|------------|--------------------|--------------------------|------------|--------------------|--------------------------|------------|
|                 | $E/\text{cm}^{-1}$ | $\mathbf{g}$             | $m_J$      | $E/\text{cm}^{-1}$ | $\mathbf{g}$             | $m_J$      | $E/\text{cm}^{-1}$ | $\mathbf{g}$             | $m_J$      |
| 1               | 0.0                | 0.001<br>0.001<br>17.765 | $\pm 15/2$ | 0.0                | 0.000<br>0.000<br>17.789 | $\pm 15/2$ | 0.0                | 0.000<br>0.000<br>17.819 | $\pm 15/2$ |
| 2               | 16.7               | 0.320<br>0.323<br>15.280 | $\pm 13/2$ | 49.4               | 0.294<br>0.295<br>15.375 | $\pm 13/2$ | 81.6               | 0.293<br>0.293<br>15.406 | $\pm 13/2$ |
| 3               | 73.5               | 0.280<br>0.287<br>11.728 | $\pm 11/2$ | 117.9              | 0.165<br>0.169<br>12.472 | $\pm 11/2$ | 155.7              | 0.185<br>0.186<br>12.702 | $\pm 11/2$ |
| 4               | 92.5               | 8.927<br>8.803<br>1.821  | $\pm 1/2$  | 160.6              | 0.037<br>0.054<br>8.325  | $\pm 9/2$  | 208.4              | 0.019<br>0.030<br>9.193  | $\pm 9/2$  |
| 5               | 97.8               | 0.052<br>0.072<br>6.882  | $\pm 9/2$  | 169.5              | 8.705<br>8.600<br>2.820  | $\pm 5/2$  | 232.1              | 8.290<br>8.230<br>3.665  | $\pm 5/2$  |
| 6               | 207.4              | 6.092<br>5.568<br>3.874  | $\pm 3/2$  | 289.9              | 8.334<br>7.976<br>1.492  | $\pm 1/2$  | 353.3              | 8.180<br>8.006<br>1.429  | $\pm 3/2$  |
| 7               | 212.4              | 0.109<br>0.398<br>6.379  | $\pm 7/2$  | 297.7              | 0.032<br>0.409<br>4.813  | $\pm 7/2$  | 372.7              | 0.046<br>0.243<br>3.979  | $\pm 7/2$  |
| 8               | 216.9              | 5.779<br>5.502<br>4.475  | $\pm 5/2$  | 305.9              | 9.055<br>8.575<br>1.749  | $\pm 3/2$  | 389.0              | 9.415<br>9.076<br>1.037  | $\pm 1/2$  |
| $\theta$<br>KDs | 75°                |                          |            | 80°                |                          |            | 85°                |                          |            |
|                 | $E/\text{cm}^{-1}$ | $\mathbf{g}$             | $m_J$      | $E/\text{cm}^{-1}$ | $\mathbf{g}$             | $m_J$      | $E/\text{cm}^{-1}$ | $\mathbf{g}$             | $m_J$      |
| 1               | 0.0                | 0.000<br>0.000<br>17.871 | $\pm 15/2$ | 0.0                | 0.000<br>0.000<br>17.907 | $\pm 15/2$ | 0.0                | 0.000<br>0.000<br>17.920 | $\pm 15/2$ |
| 2               | 126.6              | 0.284<br>0.284           | $\pm 13/2$ | 162.7              | 0.268<br>0.268           | $\pm 13/2$ | 192.1              | 0.246<br>0.246           | $\pm 13/2$ |

|          |                    |                          |            |       |                          |            |       |                          |            |
|----------|--------------------|--------------------------|------------|-------|--------------------------|------------|-------|--------------------------|------------|
|          |                    | 15.437                   |            |       | 15.458                   |            |       | 15.465                   |            |
| 3        | 204.2              | 0.205<br>0.207<br>12.866 | $\pm 11/2$ | 242.4 | 0.210<br>0.212<br>12.946 | $\pm 11/2$ | 274.9 | 0.202<br>0.203<br>12.996 | $\pm 11/2$ |
| 4        | 263.7              | 0.007<br>0.019<br>9.881  | $\pm 9/2$  | 304.3 | 0.005<br>0.015<br>10.191 | $\pm 9/2$  | 339.0 | 0.004<br>0.013<br>10.356 | $\pm 9/2$  |
| 5        | 307.6              | 7.582<br>7.549<br>4.810  | $\pm 7/2$  | 363.1 | 6.940<br>6.914<br>5.609  | $\pm 7/2$  | 408.7 | 6.422<br>6.400<br>6.131  | $\pm 7/2$  |
| 6        | 432.0              | 7.539<br>7.459<br>2.421  | $\pm 3/2$  | 492.6 | 6.930<br>6.872<br>3.221  | $\pm 3/2$  | 543.5 | 6.425<br>6.379<br>3.740  | $\pm 5/2$  |
| 7        | 470.7              | 0.057<br>0.135<br>3.428  | $\pm 5/2$  | 547.8 | 0.066<br>0.108<br>3.253  | $\pm 5/2$  | 612.2 | 0.072<br>0.096<br>3.214  | $\pm 3/2$  |
| 8        | 498.5              | 9.516<br>9.293<br>1.011  | $\pm 1/2$  | 584.9 | 9.575<br>9.376<br>1.067  | $\pm 1/2$  | 657.2 | 9.605<br>9.414<br>1.101  | $\pm 1/2$  |
| $\theta$ | 90°                |                          |            |       |                          |            |       |                          |            |
| KDs      | $E/\text{cm}^{-1}$ | $g$                      | $m_J$      |       |                          |            |       |                          |            |
| 1        | 0.0                | 0.000<br>0.000<br>17.908 | $\pm 15/2$ |       |                          |            |       |                          |            |
| 2        | 211.3              | 0.220<br>0.220<br>15.457 | $\pm 13/2$ |       |                          |            |       |                          |            |
| 3        | 299.7              | 0.182<br>0.183<br>13.025 | $\pm 11/2$ |       |                          |            |       |                          |            |
| 4        | 367.7              | 0.006<br>0.013<br>10.438 | $\pm 9/2$  |       |                          |            |       |                          |            |
| 5        | 443.6              | 6.096<br>6.119<br>6.391  | $\pm 7/2$  |       |                          |            |       |                          |            |
| 6        | 582.0              | 6.123<br>6.081<br>3.974  | $\pm 5/2$  |       |                          |            |       |                          |            |
| 7        | 659.5              | 0.079<br>0.099<br>3.247  | $\pm 3/2$  |       |                          |            |       |                          |            |
| 8        | 710.0              | 9.621<br>9.420           | $\pm 1/2$  |       |                          |            |       |                          |            |

|  |  |       |  |
|--|--|-------|--|
|  |  | 1.111 |  |
|--|--|-------|--|

**Table S7.** Wave functions with definite projection of the total moments  $|m_J\rangle$  for the lowest two KDs for **3** with the different included  $\theta$  angles (degree) keeping the Er-C bond lengths (Å) fixed using CASSCF/RASSI-SO with MOLCAS 8.4.

| $\theta$ | $E/\text{cm}^{-1}$ | wave functions            |
|----------|--------------------|---------------------------|
| 60°      | 0.0                | 98.24% $ \pm 15/2\rangle$ |
|          | 16.7               | 97.52% $ \pm 13/2\rangle$ |
| 65°      | 0.0                | 98.36% $ \pm 15/2\rangle$ |
|          | 49.4               | 98.64% $ \pm 13/2\rangle$ |
| 69.3°    | 0.0                | 98.66% $ \pm 15/2\rangle$ |
|          | 81.6               | 98.99% $ \pm 13/2\rangle$ |
| 75°      | 0.0                | 99.31% $ \pm 15/2\rangle$ |
|          | 126.6              | 99.33% $ \pm 13/2\rangle$ |
| 80°      | 0.0                | 99.78% $ \pm 15/2\rangle$ |
|          | 162.7              | 99.57% $ \pm 13/2\rangle$ |
| 85°      | 0.0                | 99.96% $ \pm 15/2\rangle$ |
|          | 192.1              | 99.65% $ \pm 13/2\rangle$ |
| 90°      | 0.0                | 99.80% $ \pm 15/2\rangle$ |
|          | 211.3              | 99.52% $ \pm 13/2\rangle$ |

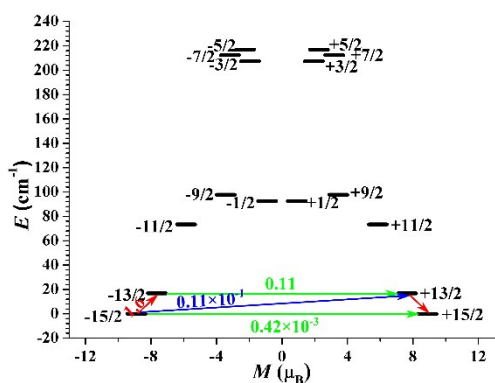

60°

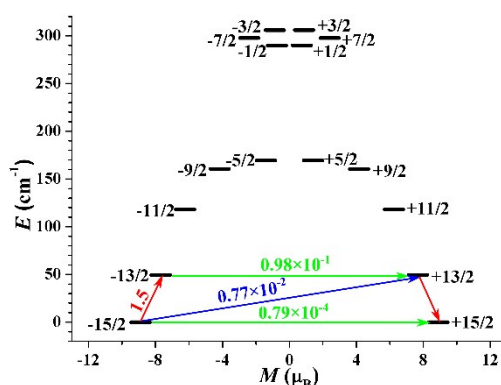

65°

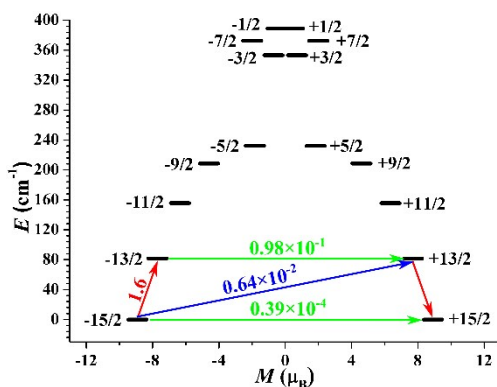

69.3°

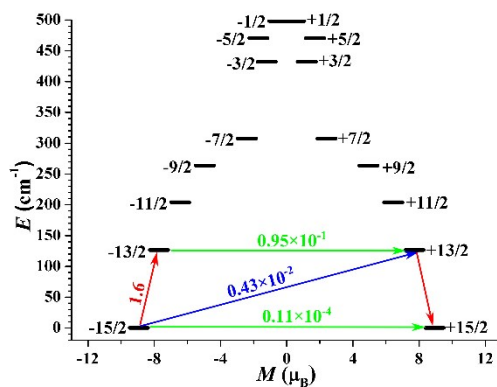

75°

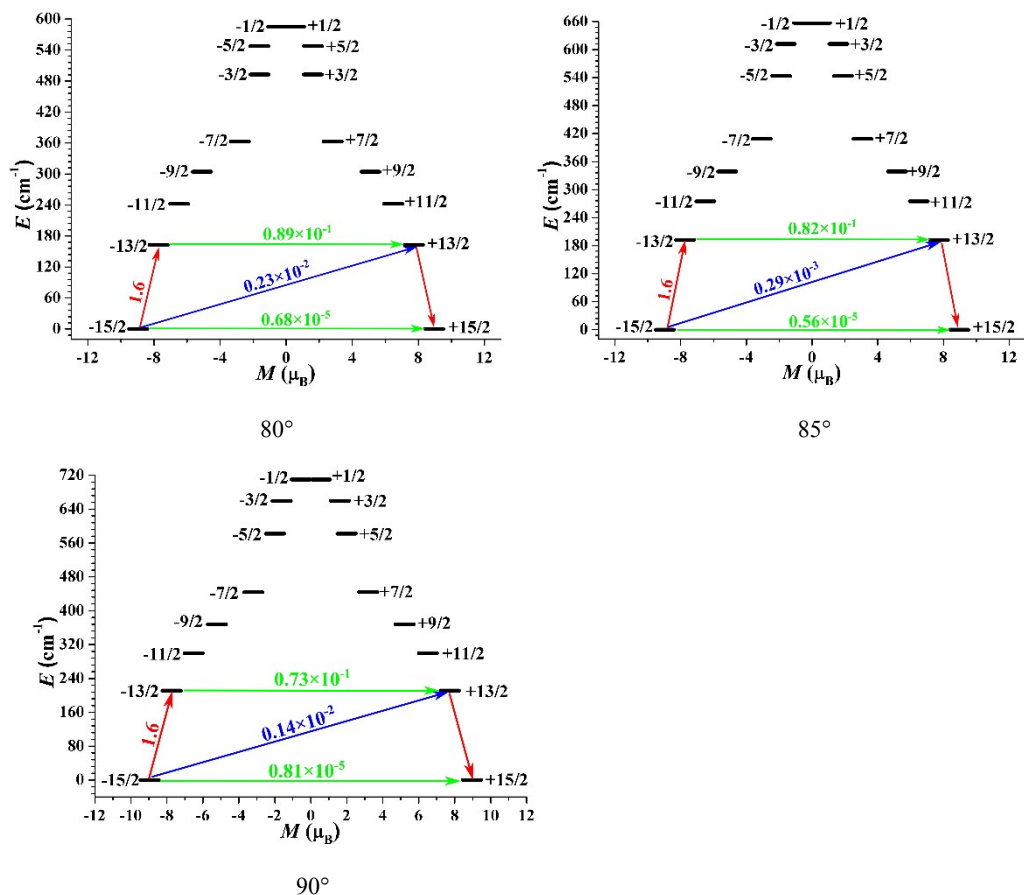

**Figure S3.** Magnetization blocking barriers for **3** with the different included  $\theta$  angles keeping the Er-C bond lengths fixed. The thick black lines represent the KDs as a function of their magnetic moments along the magnetic axes. The green lines correspond to diagonal matrix elements of their transversal magnetic moments; the blue lines represent Orbach relaxation processes. The path shown by the red arrows represent the most probable path for magnetic relaxation in the corresponding compounds. The numbers at each arrow stand for the mean absolute value of the corresponding matrix element of transition magnetic moment.

**Table S8.** Calculated energy levels ( $\text{cm}^{-1}$ ),  $\mathbf{g}$  ( $g_x, g_y, g_z$ ) tensors and predominant  $m_J$  values of the lowest eight KDs for simple model  $\text{Er}(\text{NH}_2)_3$  with the different included  $\theta$  angles (degree) keeping the Er-N bond lengths ( $\text{\AA}$ ) fixed using CASSCF/RASSI-SO with MOLCAS 8.4.

| $\theta$<br>KDs | $40^\circ$         |                          |            | $50^\circ$         |                          |            | $60^\circ$         |                          |            |
|-----------------|--------------------|--------------------------|------------|--------------------|--------------------------|------------|--------------------|--------------------------|------------|
|                 | $E/\text{cm}^{-1}$ | $\mathbf{g}$             | $m_J$      | $E/\text{cm}^{-1}$ | $\mathbf{g}$             | $m_J$      | $E/\text{cm}^{-1}$ | $\mathbf{g}$             | $m_J$      |
| 1               | 0.0                | 0.015<br>0.021<br>14.423 | $\pm 15/2$ | 0.0                | 0.000<br>0.001<br>17.062 | $\pm 15/2$ | 0.0                | 0.000<br>0.000<br>17.826 | $\pm 15/2$ |
| 2               | 19.3               | 6.918<br>6.912<br>5.366  | $\pm 7/2$  | 39.5               | 0.479<br>0.480<br>14.507 | $\pm 13/2$ | 52.7               | 0.018<br>0.019<br>15.394 | $\pm 13/2$ |
| 3               | 57.3               | 5.823<br>5.787<br>0.115  | $\pm 3/2$  | 116.2              | 0.259<br>0.266<br>11.323 | $\pm 11/2$ | 159.2              | 0.047<br>0.049<br>12.672 | $\pm 11/2$ |
| 4               | 75.9               | 0.013                    | $\pm 5/2$  | 151.5              | 9.443                    | $\pm 1/2$  | 246.1              | 0.055                    | $\pm 9/2$  |

|                 |                    |                          |            |                    |                          |            |                    |                          |            |
|-----------------|--------------------|--------------------------|------------|--------------------|--------------------------|------------|--------------------|--------------------------|------------|
|                 |                    | 0.019<br>4.434           |            |                    | 8.918<br>1.323           |            |                    | 0.062<br>9.245           |            |
| 5               | 104.8              | 7.700<br>7.617<br>0.127  | $\pm 1/2$  | 163.3              | 0.236<br>0.264<br>5.682  | $\pm 7/2$  | 284.4              | 8.079<br>7.979<br>3.684  | $\pm 5/2$  |
| 6               | 188.0              | 1.770<br>1.781<br>11.106 | $\pm 9/2$  | 232.1              | 6.780<br>6.366<br>3.856  | $\pm 3/2$  | 378.8              | 7.909<br>7.555<br>1.587  | $\pm 3/2$  |
| 7               | 229.5              | 0.016<br>0.045<br>13.075 | $\pm 13/2$ | 241.9              | 0.055<br>0.363<br>8.901  | $\pm 9/2$  | 395.6              | 0.069<br>0.503<br>4.847  | $\pm 7/2$  |
| 8               | 241.4              | 2.206<br>2.281<br>11.954 | $\pm 11/2$ | 256.4              | 6.788<br>6.517<br>5.325  | $\pm 5/2$  | 413.7              | 9.532<br>8.862<br>1.163  | $\pm 1/2$  |
| $\theta$<br>KDs | 70°                |                          |            | 74.8°              |                          |            | 80°                |                          |            |
|                 | $E/\text{cm}^{-1}$ | $g$                      | $m_J$      | $E/\text{cm}^{-1}$ | $g$                      | $m_J$      | $E/\text{cm}^{-1}$ | $g$                      | $m_J$      |
| 1               | 0.0                | 0.000<br>0.000<br>17.858 | $\pm 15/2$ | 0.0                | 0.000<br>0.000<br>17.829 | $\pm 15/2$ | 0.0                | 0.000<br>0.000<br>17.860 | $\pm 15/2$ |
| 2               | 103.4              | 0.049<br>0.049<br>15.484 | $\pm 13/2$ | 118.0              | 0.174<br>0.174<br>15.457 | $\pm 13/2$ | 215.6              | 0.076<br>0.076<br>15.484 | $\pm 13/2$ |
| 3               | 239.3              | 0.063<br>0.063<br>12.901 | $\pm 11/2$ | 225.6              | 0.154<br>0.155<br>12.843 | $\pm 11/2$ | 309.1              | 0.079<br>0.079<br>12.978 | $\pm 11/2$ |
| 4               | 331.8              | 0.020<br>0.025<br>10.117 | $\pm 9/2$  | 321.8              | 0.019<br>0.024<br>10.011 | $\pm 9/2$  | 388.3              | 0.013<br>0.016<br>10.424 | $\pm 9/2$  |
| 5               | 407.5              | 5.631<br>5.664<br>6.160  | $\pm 7/2$  | 399.4              | 5.622<br>5.662<br>6.043  | $\pm 7/2$  | 484.1              | 3.766<br>3.789<br>7.323  | $\pm 7/2$  |
| 6               | 523.1              | 5.582<br>5.516<br>3.862  | $\pm 3/2$  | 517.3              | 5.695<br>5.625<br>3.734  | $\pm 3/2$  | 624.1              | 3.760<br>3.788<br>5.004  | $\pm 5/2$  |
| 7               | 593.8              | 0.128<br>0.238<br>4.042  | $\pm 5/2$  | 592.0              | 0.117<br>0.186<br>3.831  | $\pm 5/2$  | 739.2              | 0.134<br>0.189<br>3.722  | $\pm 3/2$  |
| 8               | 638.8              | 9.613<br>9.203<br>1.093  | $\pm 1/2$  | 640.1              | 9.518<br>9.177<br>1.050  | $\pm 1/2$  | 809.7              | 9.648<br>9.310<br>1.132  | $\pm 1/2$  |
| $\theta$<br>KDs | 90°                |                          |            |                    |                          |            |                    |                          |            |
|                 | $E/\text{cm}^{-1}$ | $g$                      | $m_J$      |                    |                          |            |                    |                          |            |
| 1               | 0.0                | 0.000<br>0.000           | $\pm 15/2$ |                    |                          |            |                    |                          |            |

|   |       |                          |            |
|---|-------|--------------------------|------------|
|   |       | 17.859                   |            |
| 2 | 233.7 | 0.108<br>0.108<br>15.478 | $\pm 13/2$ |
| 3 | 322.6 | 0.098<br>0.099<br>12.983 | $\pm 11/2$ |
| 4 | 398.2 | 0.012<br>0.015<br>0.460  | $\pm 9/2$  |
| 5 | 499.4 | 3.119<br>3.143<br>7.561  | $\pm 7/2$  |
| 6 | 644.8 | 3.175<br>3.195<br>5.238  | $\pm 5/2$  |
| 7 | 772.1 | 0.141<br>0.174<br>3.632  | $\pm 3/2$  |
| 8 | 850.1 | 9.641<br>9.315<br>1.135  | $\pm 1/2$  |

**Table S9.** Wave functions with definite projection of the total moments  $|m_J\rangle$  for the lowest two KDs for simple model  $\text{Er}(\text{NH}_2)_3$  with the different included  $\theta$  angles (degree) keeping the Er-N bond lengths ( $\text{\AA}$ ) fixed using CASSCF/RASSI-SO with MOLCAS 8.4.

| $\theta$ | $E/\text{cm}^{-1}$ | wave functions                                                                                         |
|----------|--------------------|--------------------------------------------------------------------------------------------------------|
| 40°      | 0.0                | 56.95% $ \pm 15/2\rangle$ +37.72% $ \pm 9/2\rangle$                                                    |
|          | 19.3               | 12.21% $ \pm 13/2\rangle$ +40.00% $ \pm 7/2\rangle$ +41.11% $ \pm 1/2\rangle$ +6.43% $ \pm 5/2\rangle$ |
| 50°      | 0.0                | 88.44% $ \pm 15/2\rangle$ +11.02% $ \pm 9/2\rangle$                                                    |
|          | 39.5               | 86.59% $ \pm 13/2\rangle$ +12.56% $ \pm 7/2\rangle$                                                    |
| 60°      | 0.0                | 98.71% $ \pm 15/2\rangle$                                                                              |
|          | 52.7               | 98.27% $ \pm 13/2\rangle$                                                                              |
| 70°      | 0.0                | 99.20% $ \pm 15/2\rangle$                                                                              |
|          | 103.4              | 99.67% $ \pm 13/2\rangle$                                                                              |
| 74.8°    | 0.0                | 98.85% $ \pm 15/2\rangle$                                                                              |
|          | 118.0              | 99.50% $ \pm 13/2\rangle$                                                                              |
| 80°      | 0.0                | 99.29% $ \pm 15/2\rangle$                                                                              |
|          | 215.6              | 99.87% $ \pm 13/2\rangle$                                                                              |
| 90°      | 0.0                | 99.30% $ \pm 15/2\rangle$                                                                              |
|          | 233.7              | 99.84% $ \pm 13/2\rangle$                                                                              |

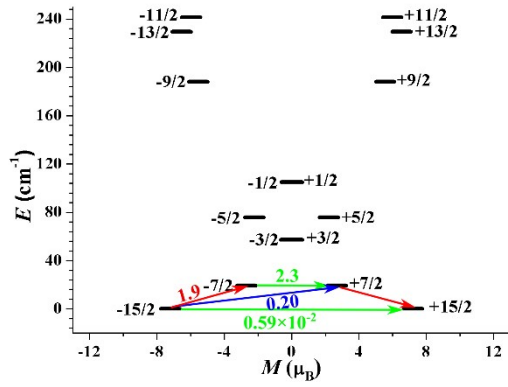

$40^\circ$

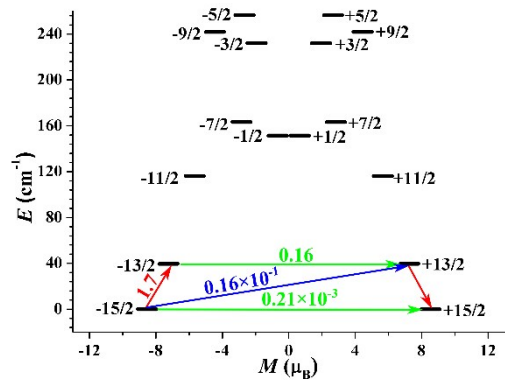

$50^\circ$

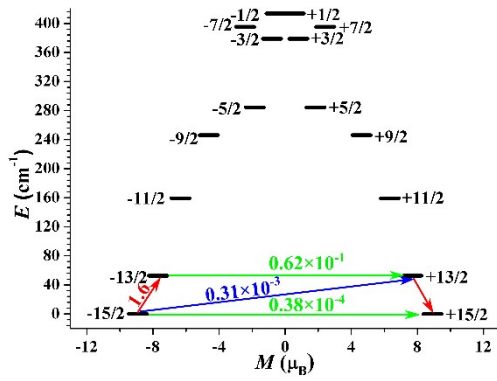

$60^\circ$

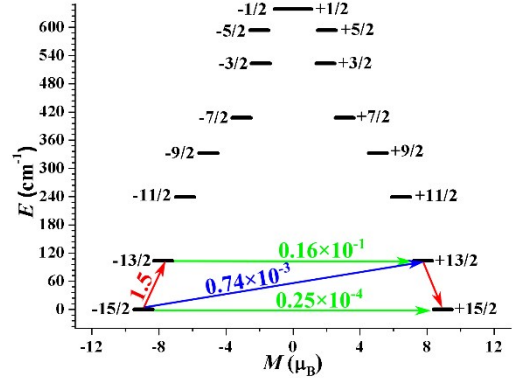

$70^\circ$

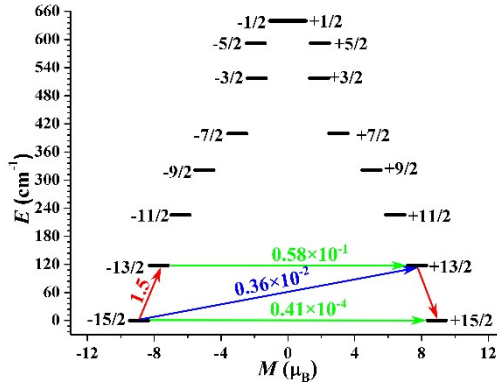

$74.8^\circ$

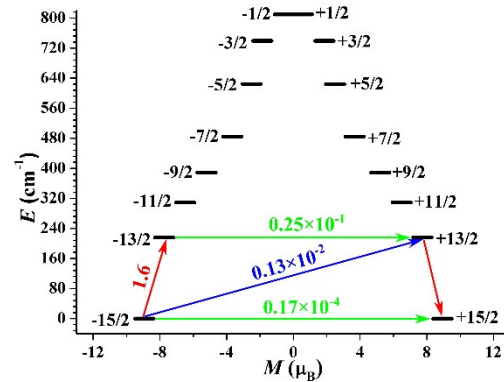

$80^\circ$

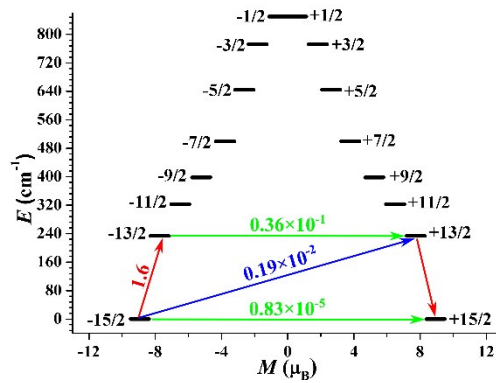

$90^\circ$

**Figure S4.** Magnetization blocking barriers for simple model  $\text{Er}(\text{NH}_2)_3$  with the different included  $\theta$  angles keeping the Er-N bond lengths fixed. The thick black lines represent the KDs as a function of their magnetic moments along the magnetic axes. The green lines correspond to diagonal matrix elements of their transversal magnetic moments; the blue lines represent Orbach relaxation processes. The path shown by the red arrows represent the most probable path for magnetic relaxation in the corresponding compounds. The numbers at each arrow stand for the mean absolute value of the corresponding matrix element of transition magnetic moment.

**Table S10.** Calculated energy levels ( $\text{cm}^{-1}$ ),  $\mathbf{g}$  ( $g_x, g_y, g_z$ ) tensors and predominant  $m_J$  values of the lowest eight KDs for **1** with the different Er-N bond lengths ( $\text{\AA}$ ) keeping the  $\theta$  of  $90^\circ$  using CASSCF/RASSI-SO with MOLCAS 8.4.

| Er-N<br>KDs | 1.80 $\text{\AA}$  |                          |            | 1.90 $\text{\AA}$  |                          |            | 2.00 $\text{\AA}$  |                          |            |
|-------------|--------------------|--------------------------|------------|--------------------|--------------------------|------------|--------------------|--------------------------|------------|
|             | $E/\text{cm}^{-1}$ | $\mathbf{g}$             | $m_J$      | $E/\text{cm}^{-1}$ | $\mathbf{g}$             | $m_J$      | $E/\text{cm}^{-1}$ | $\mathbf{g}$             | $m_J$      |
| 1           | 0.0                | 0.005<br>0.013<br>15.068 | $\pm 15/2$ | 0.0                | 0.036<br>0.063<br>17.009 | $\pm 15/2$ | 0.0                | 0.000<br>0.000<br>17.702 | $\pm 15/2$ |
| 2           | 121.7              | 7.021<br>6.987<br>5.302  | $\pm 7/2$  | 194.6              | 1.204<br>4.506<br>10.944 | $\pm 9/2$  | 241.3              | 0.302<br>0.303<br>15.246 | $\pm 13/2$ |
| 3           | 170.8              | 0.018<br>0.062<br>12.125 | $\pm 11/2$ | 207.3              | 0.669<br>3.423<br>11.914 | $\pm 7/2$  | 283.2              | 0.285<br>0.287<br>12.935 | $\pm 11/2$ |
| 4           | 179.5              | 1.697<br>1.740<br>11.706 | $\pm 9/2$  | 236.3              | 0.894<br>4.276<br>11.043 | $\pm 13/2$ | 320.5              | 0.010<br>0.017<br>10.570 | $\pm 9/2$  |
| 5           | 266.1              | 1.522<br>1.531<br>13.713 | $\pm 13/2$ | 294.8              | 1.920<br>3.592<br>12.344 | $\pm 11/2$ | 404.2              | 4.223<br>4.245<br>7.378  | $\pm 7/2$  |
| 6           | 452.5              | 7.371<br>7.288<br>2.316  | $\pm 3/2$  | 487.8              | 3.241<br>4.287<br>8.600  | $\pm 3/2$  | 568.3              | 4.258<br>4.305<br>4.888  | $\pm 5/2$  |
| 7           | 597.0              | 0.037<br>0.181<br>3.366  | $\pm 5/2$  | 643.6              | 3.603<br>2.788<br>1.490  | $\pm 5/2$  | 710.0              | 0.066<br>0.149<br>3.602  | $\pm 3/2$  |
| 8           | 705.1              | 9.397<br>9.175<br>0.891  | $\pm 1/2$  | 746.5              | 9.876<br>8.902<br>1.024  | $\pm 1/2$  | 800.7              | 9.585<br>9.370<br>1.130  | $\pm 1/2$  |
| Er-N<br>KDs | 2.10 $\text{\AA}$  |                          |            | 2.20 $\text{\AA}$  |                          |            | 2.30 $\text{\AA}$  |                          |            |
|             | $E/\text{cm}^{-1}$ | $\mathbf{g}$             | $m_J$      | $E/\text{cm}^{-1}$ | $\mathbf{g}$             | $m_J$      | $E/\text{cm}^{-1}$ | $\mathbf{g}$             | $m_J$      |
| 1           | 0.0                | 0.000<br>0.000<br>17.810 | $\pm 15/2$ | 0.0                | 0.000<br>0.000<br>17.862 | $\pm 15/2$ | 0.0                | 0.000<br>0.000<br>17.892 | $\pm 15/2$ |
| 2           | 230.8              | 0.155<br>0.155<br>15.398 | $\pm 13/2$ | 214.5              | 0.116<br>0.116<br>15.451 | $\pm 13/2$ | 196.7              | 0.093<br>0.093<br>15.480 | $\pm 13/2$ |
| 3           | 295.4              | 0.147                    | $\pm 11/2$ | 292.5              | 0.105                    | $\pm 11/2$ | 281.6              | 0.081                    | $\pm 11/2$ |



|             |                    |                          |            |                    |                          |            |                    |                          |            |
|-------------|--------------------|--------------------------|------------|--------------------|--------------------------|------------|--------------------|--------------------------|------------|
|             |                    | 0.148<br>13.003          |            |                    | 0.106<br>13.036          |            |                    | 0.082<br>13.058          |            |
| 4           | 350.4              | 0.008<br>0.014<br>10.564 | $\pm 9/2$  | 358.3              | 0.008<br>0.013<br>10.564 | $\pm 9/2$  | 353.4              | 0.009<br>0.012<br>10.572 | $\pm 9/2$  |
| 5           | 440.6              | 3.778<br>3.796<br>7.515  | $\pm 7/2$  | 448.4              | 3.863<br>3.881<br>7.493  | $\pm 7/2$  | 440.8              | 3.980<br>3.998<br>7.467  | $\pm 7/2$  |
| 6           | 586.8              | 3.788<br>3.822<br>5.108  | $\pm 5/2$  | 581.5              | 3.877<br>3.903<br>5.097  | $\pm 5/2$  | 561.4              | 3.998<br>4.017<br>5.070  | $\pm 5/2$  |
| 7           | 712.1              | 0.076<br>0.140<br>3.563  | $\pm 3/2$  | 690.2              | 0.084<br>0.134<br>3.528  | $\pm 3/2$  | 655.4              | 0.090<br>0.131<br>3.509  | $\pm 3/2$  |
| 8           | 790.7              | 9.605<br>9.390<br>1.140  | $\pm 1/2$  | 757.5              | 9.619<br>9.400<br>1.141  | $\pm 1/2$  | 713.0              | 9.630<br>9.408<br>1.141  | $\pm 1/2$  |
| Er-N<br>KDs | 2.40 Å             |                          |            | 2.50 Å             |                          |            | 2.60 Å             |                          |            |
|             | $E/\text{cm}^{-1}$ | $g$                      | $m_J$      | $E/\text{cm}^{-1}$ | $g$                      | $m_J$      | $E/\text{cm}^{-1}$ | $g$                      | $m_J$      |
| 1           | 0.0                | 0.000<br>0.000<br>17.910 | $\pm 15/2$ | 0.0                | 0.000<br>0.000<br>17.923 | $\pm 15/2$ | 0.0                | 0.000<br>0.000<br>17.932 | $\pm 15/2$ |
| 2           | 179.3              | 0.076<br>0.076<br>15.498 | $\pm 13/2$ | 163.1              | 0.062<br>0.062<br>15.512 | $\pm 13/2$ | 148.6              | 0.050<br>0.050<br>15.521 | $\pm 13/2$ |
| 3           | 267.1              | 0.064<br>0.065<br>13.076 | $\pm 11/2$ | 251.2              | 0.050<br>0.051<br>13.090 | $\pm 11/2$ | 235.2              | 0.039<br>0.040<br>13.102 | $\pm 11/2$ |
| 4           | 341.5              | 0.008<br>0.012<br>10.587 | $\pm 9/2$  | 326.0              | 0.008<br>0.011<br>10.605 | $\pm 9/2$  | 309.0              | 0.008<br>0.010<br>10.624 | $\pm 9/2$  |
| 5           | 425.1              | 4.013<br>4.030<br>7.474  | $\pm 7/2$  | 405.2              | 3.968<br>3.984<br>7.512  | $\pm 7/2$  | 383.8              | 3.866<br>3.880<br>7.569  | $\pm 7/2$  |
| 6           | 533.5              | 4.031<br>4.046<br>5.074  | $\pm 5/2$  | 502.4              | 3.985<br>3.997<br>5.109  | $\pm 5/2$  | 470.7              | 3.881<br>3.892<br>5.166  | $\pm 5/2$  |
| 7           | 615.1              | 0.096<br>0.129<br>3.501  | $\pm 3/2$  | 573.6              | 0.102<br>0.130<br>3.501  | $\pm 3/2$  | 533.3              | 0.106<br>0.130<br>3.506  | $\pm 3/2$  |
| 8           | 664.5              | 9.640<br>9.414<br>1.143  | $\pm 1/2$  | 616.2              | 9.651<br>9.418<br>1.146  | $\pm 1/2$  | 570.3              | 9.660<br>9.422<br>1.151  | $\pm 1/2$  |
| Er-N        | 2.70 Å             |                          |            |                    |                          |            |                    |                          |            |

| KDs | $E/\text{cm}^{-1}$ | $g$     | $m_J$      |
|-----|--------------------|---------|------------|
| 1   | 0.0                | 0.000   | $\pm 15/2$ |
|     |                    | 0.000   |            |
|     |                    | 17.939  |            |
| 2   | 135.8              | 0.040   | $\pm 13/2$ |
|     |                    | 0.040   |            |
|     |                    | 15.529  |            |
| 3   | 220.0              | 0.031   | $\pm 11/2$ |
|     |                    | 0.032   |            |
|     |                    | 13.113  |            |
| 4   | 291.8              | 0.007   | $\pm 9/2$  |
|     |                    | 0.009   |            |
|     |                    | 10.6431 |            |
| 5   | 362.1              | 3.725   | $\pm 7/2$  |
|     |                    | 3.738   |            |
|     |                    | 7.638   |            |
| 6   | 440.1              | 3.738   | $\pm 5/2$  |
|     |                    | 3.748   |            |
|     |                    | 5.234   |            |
| 7   | 495.5              | 0.109   | $\pm 3/2$  |
|     |                    | 0.130   |            |
|     |                    | 3.513   |            |
| 8   | 527.8              | 9.668   | $\pm 1/2$  |
|     |                    | 9.426   |            |
|     |                    | 1.156   |            |

**Table S11.** Wave functions with definite projection of the total moments  $|m_J\rangle$  for the lowest two KDs for **1** with the different Er-N bond lengths ( $\text{\AA}$ ) keeping the  $\theta$  of  $90^\circ$  using CASSCF/RASSI-SO with MOLCAS 8.4.

| $\theta$          | $E/\text{cm}^{-1}$ | wave functions                                                                                                                |
|-------------------|--------------------|-------------------------------------------------------------------------------------------------------------------------------|
| 1.80 $\text{\AA}$ | 0.0                | $66.66\% \pm 15/2\rangle + 30.06\% \pm 9/2\rangle$                                                                            |
|                   | 121.7              | $64.87\% \pm 7/2\rangle + 19.66\% \pm 5/2\rangle + 7.13\% \pm 1/2\rangle + 7.45\% \pm 13/2\rangle$                            |
| 1.90 $\text{\AA}$ | 0.0                | $88.28\% \pm 15/2\rangle + 9.56\% \pm 9/2\rangle$                                                                             |
|                   | 194.6              | $17.80\% \pm 13/2\rangle + 26.03\% \pm 11/2\rangle + 29.00\% \pm 9/2\rangle + 14.38\% \pm 7/2\rangle + 5.30\% \pm 5/2\rangle$ |
| 2.00 $\text{\AA}$ | 0.0                | $97.86\% \pm 15/2\rangle$                                                                                                     |
|                   | 241.3              | $97.57\% \pm 13/2\rangle$                                                                                                     |
| 2.10 $\text{\AA}$ | 0.0                | $98.95\% \pm 15/2\rangle$                                                                                                     |
|                   | 230.8              | $99.07\% \pm 13/2\rangle$                                                                                                     |
| 2.20 $\text{\AA}$ | 0.0                | $99.40\% \pm 15/2\rangle$                                                                                                     |
|                   | 214.5              | $99.52\% \pm 13/2\rangle$                                                                                                     |
| 2.30 $\text{\AA}$ | 0.0                | $99.61\% \pm 15/2\rangle$                                                                                                     |
|                   | 196.7              | $99.69\% \pm 13/2\rangle$                                                                                                     |
| 2.40 $\text{\AA}$ | 0.0                | $99.74\% \pm 15/2\rangle$                                                                                                     |
|                   | 179.3              | $99.79\% \pm 13/2\rangle$                                                                                                     |

|        |       |               |
|--------|-------|---------------|
| 2.50 Å | 0.0   | 99.82% ±15/2> |
|        | 163.1 | 99.84% ±13/2> |
| 2.60 Å | 0.0   | 99.87% ±15/2> |
|        | 148.6 | 99.88% ±13/2> |
| 2.70 Å | 0.0   | 99.90% ±15/2> |
|        | 135.8 | 99.91% ±13/2> |

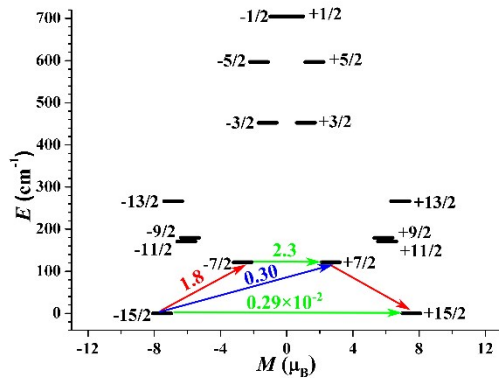

1.80 Å

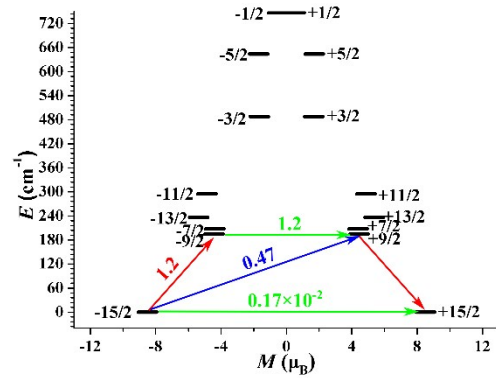

1.90 Å

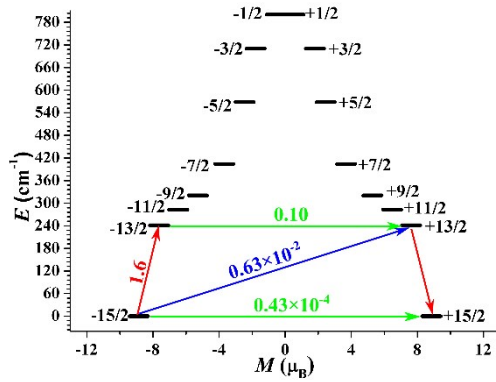

2.00 Å

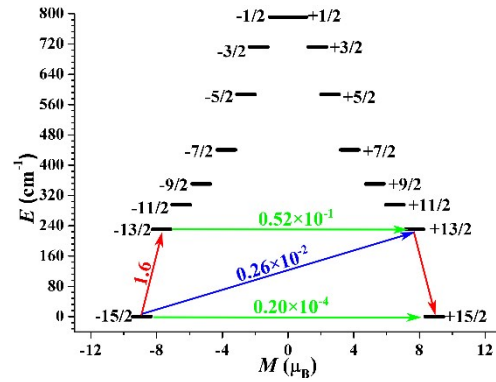

2.10 Å

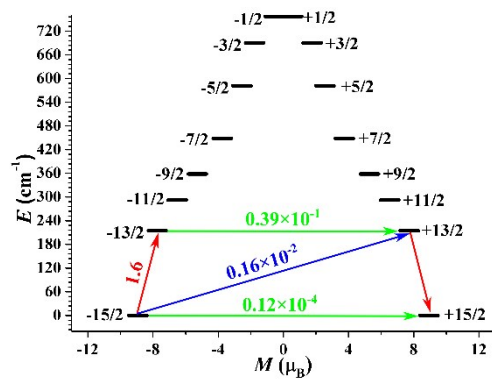

2.20 Å

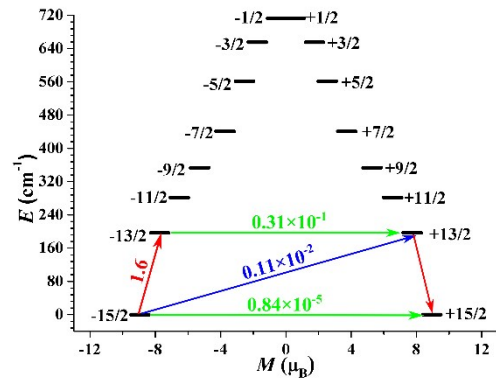

2.30 Å

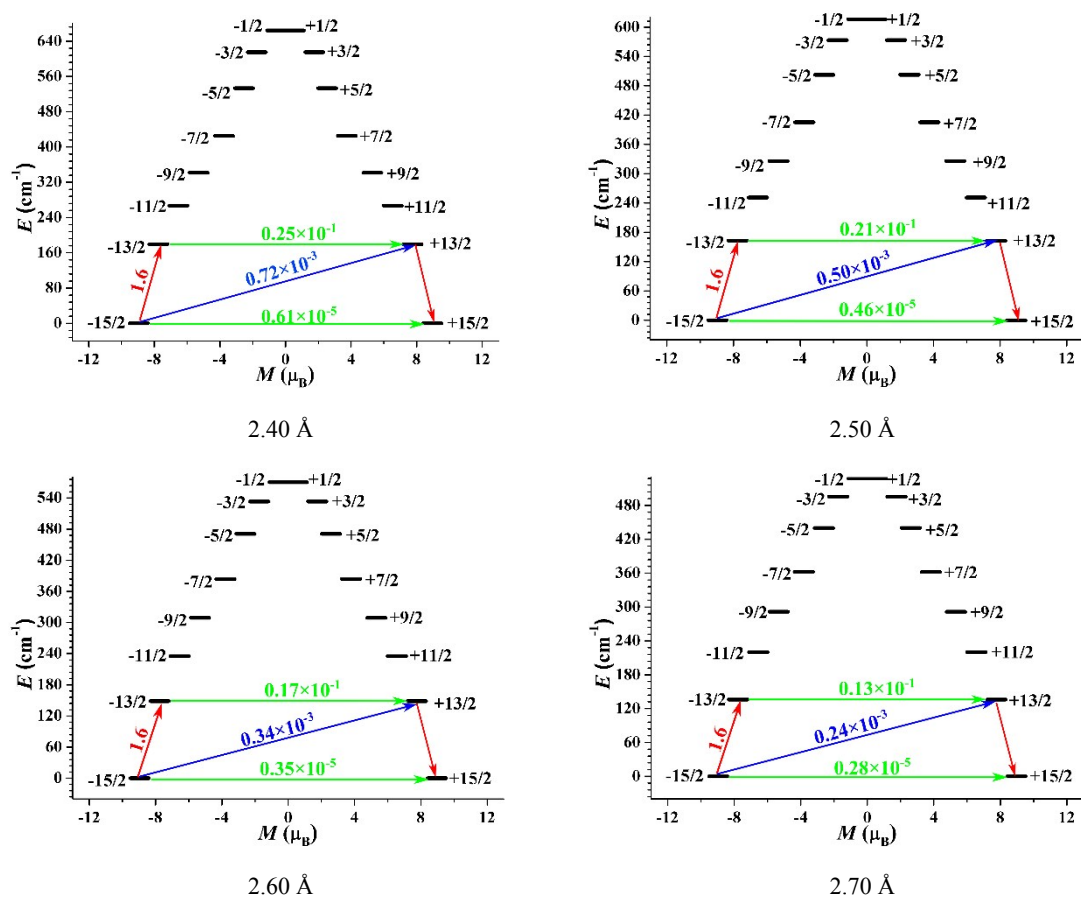

**Figure S5.** Magnetization blocking barriers for **1** with the different Er-N bond lengths keeping the  $\theta$  of 90°. The thick black lines represent the KDs as a function of their magnetic moments along the magnetic axes. The green lines correspond to diagonal matrix elements of their transversal magnetic moments; the blue lines represent Orbach relaxation processes. The path shown by the red arrows represent the most probable path for magnetic relaxation in the corresponding compounds. The numbers at each arrow stand for the mean absolute value of the corresponding matrix element of transition magnetic moment.

**Table S12.** Calculated energy levels (cm<sup>-1</sup>),  $\mathbf{g}$  ( $g_x, g_y, g_z$ ) tensors and predominant  $m_J$  values of the lowest eight KDs of **2** with the different Er-O bond lengths (Å) keeping the  $\theta$  of 90° using CASSCF/RASSI-SO with MOLCAS 8.4.

| Er-O<br>KDs | 1.80 Å             |                          |            | 1.90 Å             |                          |            | 2.00 Å             |                          |            |
|-------------|--------------------|--------------------------|------------|--------------------|--------------------------|------------|--------------------|--------------------------|------------|
|             | $E/\text{cm}^{-1}$ | $\mathbf{g}$             | $m_J$      | $E/\text{cm}^{-1}$ | $\mathbf{g}$             | $m_J$      | $E/\text{cm}^{-1}$ | $\mathbf{g}$             | $m_J$      |
| 1           | 0.0                | 0.083<br>0.210<br>17.177 | $\pm 15/2$ | 0.0                | 0.008<br>0.016<br>17.724 | $\pm 15/2$ | 0.0                | 0.001<br>0.002<br>17.840 | $\pm 15/2$ |
| 2           | 112.4              | 2.183<br>3.269<br>13.574 | $\pm 13/2$ | 142.4              | 0.281<br>0.316<br>15.436 | $\pm 13/2$ | 153.2              | 0.058<br>0.061<br>15.487 | $\pm 13/2$ |
| 3           | 139.9              | 2.312<br>2.996<br>11.211 | $\pm 11/2$ | 211.5              | 0.242<br>0.303<br>12.977 | $\pm 11/2$ | 244.9              | 0.045<br>0.057<br>13.071 | $\pm 11/2$ |
| 4           | 196.0              | 0.882<br>1.016           | $\pm 9/2$  | 293.2              | 0.450<br>0.514           | $\pm 9/2$  | 339.3              | 0.297<br>0.326           | $\pm 9/2$  |

|      |                    |                          |            |                    |                          |            |                    |                          |            |
|------|--------------------|--------------------------|------------|--------------------|--------------------------|------------|--------------------|--------------------------|------------|
|      |                    | 10.775                   |            |                    | 10.536                   |            |                    | 10.639                   |            |
| 5    | 261.8              | 5.242<br>5.829<br>8.022  | $\pm 7/2$  | 391.6              | 4.731<br>5.594<br>6.867  | $\pm 7/2$  | 446.0              | 2.981<br>3.507<br>7.711  | $\pm 7/2$  |
| 6    | 497.7              | 2.509<br>2.671<br>11.332 | $\pm 5/2$  | 550.7              | 1.734<br>4.047<br>8.858  | $\pm 5/2$  | 571.6              | 6.212<br>5.028<br>0.508  | $\pm 5/2$  |
| 7    | 625.3              | 1.644<br>2.056<br>11.002 | $\pm 3/2$  | 666.4              | 2.236<br>2.579<br>10.111 | $\pm 3/2$  | 672.9              | 2.644<br>3.016<br>9.274  | $\pm 3/2$  |
| 8    | 735.4              | 0.550<br>2.564<br>15.301 | $\pm 1/2$  | 758.7              | 0.640<br>2.918<br>15.197 | $\pm 1/2$  | 750.6              | 0.692<br>3.119<br>15.096 | $\pm 1/2$  |
| Er-O | 2.10 Å             |                          |            | 2.20 Å             |                          |            | 2.30 Å             |                          |            |
| KDs  | $E/\text{cm}^{-1}$ | <b>g</b>                 | $m_J$      | $E/\text{cm}^{-1}$ | <b>g</b>                 | $m_J$      | $E/\text{cm}^{-1}$ | <b>g</b>                 | $m_J$      |
| 1    | 0.0                | 0.000<br>0.000<br>17.888 | $\pm 15/2$ | 0.0                | 0.000<br>0.000<br>17.914 | $\pm 15/2$ | 0.0                | 0.000<br>0.000<br>17.929 | $\pm 15/2$ |
| 2    | 152.5              | 0.017<br>0.018<br>15.506 | $\pm 13/2$ | 145.9              | 0.008<br>0.009<br>15.519 | $\pm 13/2$ | 136.6              | 0.006<br>0.006<br>15.529 | $\pm 13/2$ |
| 3    | 254.3              | 0.012<br>0.017<br>13.102 | $\pm 11/2$ | 250.5              | 0.004<br>0.010<br>13.116 | $\pm 11/2$ | 240.0              | 0.002<br>0.007<br>13.125 | $\pm 11/2$ |
| 4    | 353.2              | 0.218<br>0.235<br>10.681 | $\pm 9/2$  | 349.0              | 0.187<br>0.198<br>10.697 | $\pm 9/2$  | 335.2              | 0.170<br>0.177<br>10.706 | $\pm 9/2$  |
| 5    | 457.8              | 1.957<br>2.323<br>8.030  | $\pm 7/2$  | 447.9              | 1.639<br>1.944<br>8.120  | $\pm 7/2$  | 427.1              | 1.533<br>1.803<br>8.157  | $\pm 7/2$  |
| 6    | 566.4              | 5.493<br>4.407<br>0.027  | $\pm 5/2$  | 544.2              | 5.609<br>3.575<br>0.051  | $\pm 5/2$  | 512.9              | 5.668<br>3.079<br>0.265  | $\pm 5/2$  |
| 7    | 653.2              | 2.827<br>3.474<br>8.656  | $\pm 3/2$  | 618.4              | 2.904<br>3.906<br>8.238  | $\pm 3/2$  | 576.6              | 2.938<br>4.294<br>7.969  | $\pm 3/2$  |
| 8    | 719.1              | 0.712<br>3.180<br>15.066 | $\pm 1/2$  | 674.8              | 0.713<br>3.152<br>15.094 | $\pm 1/2$  | 625.3              | 0.705<br>3.068<br>15.161 | $\pm 1/2$  |
| Er-O | 2.40 Å             |                          |            | 2.50 Å             |                          |            | 2.60 Å             |                          |            |
| KDs  | $E/\text{cm}^{-1}$ | <b>g</b>                 | $m_J$      | $E/\text{cm}^{-1}$ | <b>g</b>                 | $m_J$      | $E/\text{cm}^{-1}$ | <b>g</b>                 | $m_J$      |
| 1    | 0.0                | 0.000<br>0.000<br>17.939 | $\pm 15/2$ | 0.0                | 0.000<br>0.000<br>17.946 | $\pm 15/2$ | 0.0                | 0.000<br>0.000<br>17.950 | $\pm 15/2$ |

|   |       |                          |            |       |                          |            |       |                          |            |
|---|-------|--------------------------|------------|-------|--------------------------|------------|-------|--------------------------|------------|
| 2 | 126.6 | 0.004<br>0.004<br>15.536 | $\pm 13/2$ | 116.6 | 0.003<br>0.003<br>15.541 | $\pm 13/2$ | 107.2 | 0.002<br>0.002<br>15.545 | $\pm 13/2$ |
| 3 | 226.0 | 0.001<br>0.005<br>13.132 | $\pm 11/2$ | 210.9 | 0.000<br>0.004<br>13.137 | $\pm 11/2$ | 195.8 | 0.000<br>0.003<br>13.141 | $\pm 11/2$ |
| 4 | 316.6 | 0.155<br>0.160<br>10.714 | $\pm 9/2$  | 296.0 | 0.139<br>0.142<br>10.721 | $\pm 9/2$  | 275.2 | 0.123<br>0.125<br>10.727 | $\pm 9/2$  |
| 5 | 401.3 | 1.424<br>1.663<br>8.187  | $\pm 7/2$  | 373.8 | 1.282<br>1.492<br>8.217  | $\pm 7/2$  | 346.3 | 1.121<br>1.304<br>8.243  | $\pm 7/2$  |
| 6 | 477.7 | 0.414<br>2.668<br>5.712  | $\pm 5/2$  | 441.8 | 0.487<br>2.281<br>5.749  | $\pm 5/2$  | 407.1 | 0.513<br>1.910<br>5.779  | $\pm 5/2$  |
| 7 | 532.9 | 2.949<br>4.645<br>7.802  | $\pm 3/2$  | 489.9 | 2.946<br>4.966<br>7.702  | $\pm 3/2$  | 449.4 | 2.932<br>5.272<br>7.649  | $\pm 3/2$  |
| 8 | 575.4 | 0.689<br>2.950<br>15.252 | $\pm 1/2$  | 527.5 | 0.670<br>2.811<br>15.356 | $\pm 1/2$  | 482.8 | 0.646<br>2.656<br>15.471 | $\pm 1/2$  |

| Er-O<br>KDs | 2.70 Å             |                          |            |
|-------------|--------------------|--------------------------|------------|
|             | $E/\text{cm}^{-1}$ | $g$                      | $m_J$      |
| 1           | 0.0                | 0.000<br>0.000<br>17.954 | $\pm 15/2$ |
| 2           | 98.6               | 0.002<br>0.002<br>15.549 | $\pm 13/2$ |
| 3           | 181.3              | 0.001<br>0.003<br>13.144 | $\pm 11/2$ |
| 4           | 255.0              | 0.107<br>0.109<br>10.732 | $\pm 9/2$  |
| 5           | 320.0              | 0.953<br>1.112<br>8.266  | $\pm 7/2$  |
| 6           | 374.4              | 0.511<br>1.557<br>5.801  | $\pm 5/2$  |
| 7           | 411.8              | 7.627<br>5.568<br>2.910  | $\pm 3/2$  |

|   |       |                          |           |
|---|-------|--------------------------|-----------|
| 8 | 441.9 | 0.619<br>2.488<br>15.595 | $\pm 1/2$ |
|---|-------|--------------------------|-----------|

**Table S13.** Wave functions with definite projection of the total moments  $|m_J\rangle$  for the lowest two KDs for **2** with the different Er-O bond lengths ( $\text{\AA}$ ) keeping the  $\theta$  of  $90^\circ$  using CASSCF/RASSI-SO with MOLCAS 8.4.

| $\theta$          | $E/\text{cm}^{-1}$ | wave functions                                      |
|-------------------|--------------------|-----------------------------------------------------|
| 1.80 $\text{\AA}$ | 0.0                | $90.39\% \pm 15/2\rangle + 4.77\% \pm 9/2\rangle$   |
|                   | 112.4              | $82.59\% \pm 13/2\rangle + 12.70\% \pm 11/2\rangle$ |
| 1.90 $\text{\AA}$ | 0.0                | $97.91\% \pm 15/2\rangle$                           |
|                   | 142.4              | $96.79\% \pm 13/2\rangle$                           |
| 2.00 $\text{\AA}$ | 0.0                | $99.40\% \pm 15/2\rangle$                           |
|                   | 153.9              | $99.07\% \pm 13/2\rangle$                           |
| 2.10 $\text{\AA}$ | 0.0                | $99.58\% \pm 15/2\rangle$                           |
|                   | 152.5              | $99.35\% \pm 13/2\rangle$                           |
| 2.20 $\text{\AA}$ | 0.0                | $99.75\% \pm 15/2\rangle$                           |
|                   | 145.9              | $99.61\% \pm 13/2\rangle$                           |
| 2.30 $\text{\AA}$ | 0.0                | $99.84\% \pm 15/2\rangle$                           |
|                   | 136.6              | $99.74\% \pm 13/2\rangle$                           |
| 2.40 $\text{\AA}$ | 0.0                | $99.89\% \pm 15/2\rangle$                           |
|                   | 126.6              | $99.81\% \pm 13/2\rangle$                           |
| 2.50 $\text{\AA}$ | 0.0                | $99.92\% \pm 15/2\rangle$                           |
|                   | 116.6              | $99.85\% \pm 13/2\rangle$                           |
| 2.60 $\text{\AA}$ | 0.0                | $99.93\% \pm 15/2\rangle$                           |
|                   | 107.2              | $99.87\% \pm 13/2\rangle$                           |
| 2.70 $\text{\AA}$ | 0.0                | $99.94\% \pm 15/2\rangle$                           |
|                   | 98.6               | $99.89\% \pm 13/2\rangle$                           |

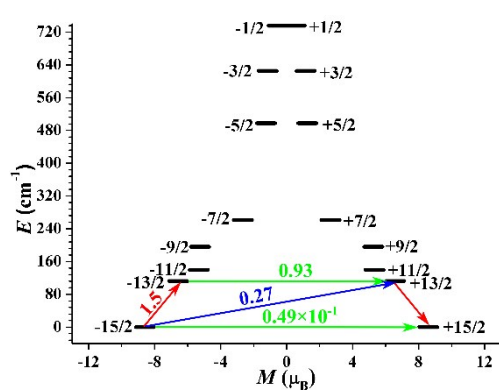

1.80  $\text{\AA}$

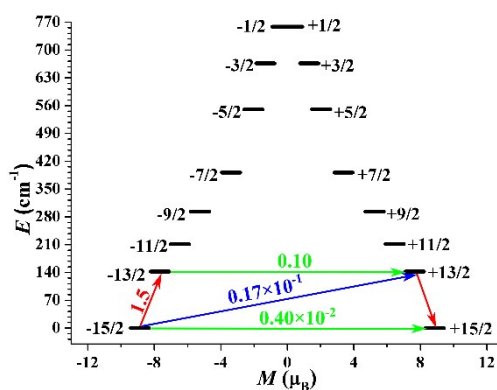

1.90  $\text{\AA}$

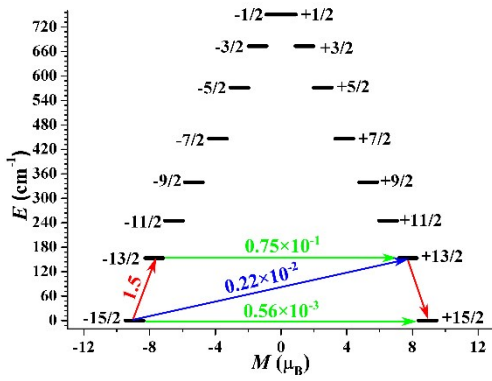

2.00 Å

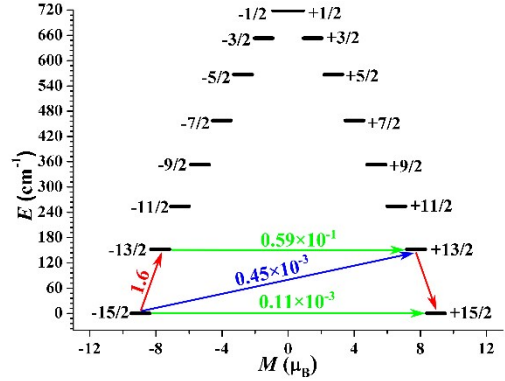

2.10 Å

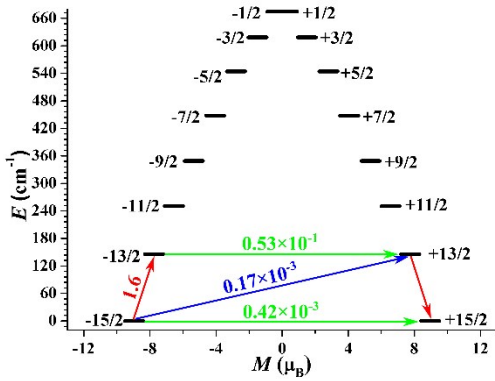

2.20 Å

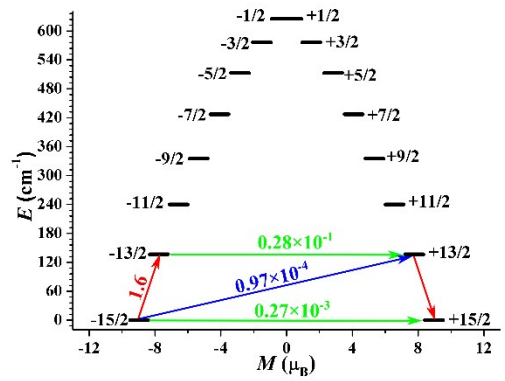

2.30 Å

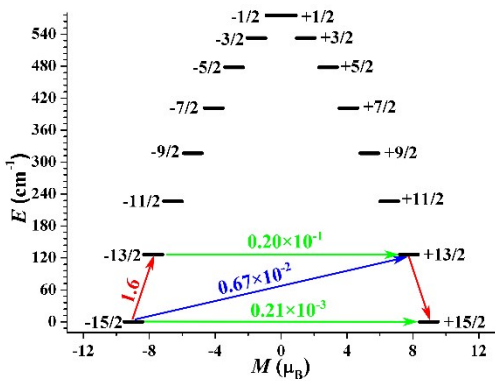

2.40 Å

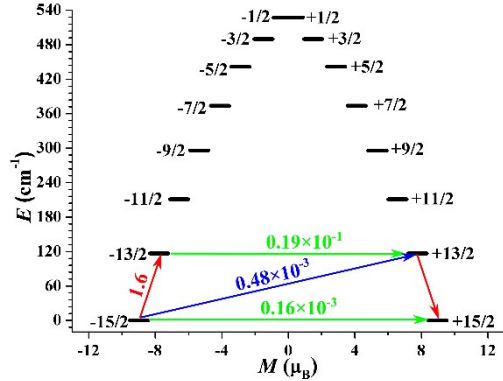

2.50 Å

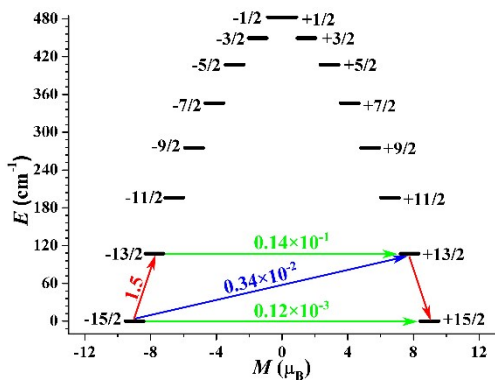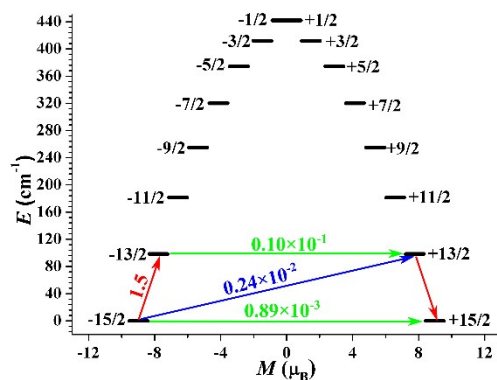



2.60 Å

2.70 Å

**Figure S6.** Magnetization blocking barriers for **2** with the different Er-O bond lengths keeping the  $\theta$  of 90°. The thick black lines represent the KDs as a function of their magnetic moments along the magnetic axes. The green lines correspond to diagonal matrix elements of their transversal magnetic moments; the blue lines represent Orbach relaxation processes. The path shown by the red arrows represent the most probable path for magnetic relaxation in the corresponding compounds. The numbers at each arrow stand for the mean absolute value of the corresponding matrix element of transition magnetic moment.

**Table S14.** Calculated energy levels ( $\text{cm}^{-1}$ ),  $\mathbf{g}$  ( $g_x, g_y, g_z$ ) tensors and predominant  $m_J$  values of the lowest eight KDs of **3** with the different Er-C bond lengths (Å) keeping the  $\theta$  of 90° using CASSCF/RASSI-SO with MOLCAS 8.4.

| Er-C<br>KDs | 1.80 Å             |                          |            | 1.90 Å             |                          |            | 2.00 Å             |                          |            |
|-------------|--------------------|--------------------------|------------|--------------------|--------------------------|------------|--------------------|--------------------------|------------|
|             | $E/\text{cm}^{-1}$ | $\mathbf{g}$             | $m_J$      | $E/\text{cm}^{-1}$ | $\mathbf{g}$             | $m_J$      | $E/\text{cm}^{-1}$ | $\mathbf{g}$             | $m_J$      |
| 1           | 0.0                | 0.007<br>0.011<br>12.682 | $\pm 15/2$ | 0.0                | 0.000<br>0.001<br>17.291 | $\pm 15/2$ | 0.0                | 0.000<br>0.000<br>17.703 | $\pm 15/2$ |
| 2           | 44.0               | 7.586<br>7.573<br>3.491  | $\pm 5/2$  | 170.5              | 2.966<br>2.975<br>12.206 | $\pm 13/2$ | 215.2              | 0.992<br>0.994<br>14.956 | $\pm 13/2$ |
| 3           | 101.8              | 4.905<br>4.942<br>6.505  | $\pm 9/2$  | 207.7              | 2.408<br>2.409<br>10.845 | $\pm 11/2$ | 270.3              | 0.871<br>0.872<br>12.645 | $\pm 11/2$ |
| 4           | 130.2              | 0.017<br>0.025<br>10.803 | $\pm 13/2$ | 223.2              | 0.002<br>0.031<br>9.651  | $\pm 9/2$  | 306.1              | 0.001<br>0.020<br>10.096 | $\pm 9/2$  |
| 5           | 163.8              | 4.077<br>4.096<br>10.253 | $\pm 11/2$ | 250.4              | 6.900<br>6.838<br>5.782  | $\pm 7/2$  | 357.2              | 7.049<br>7.013<br>5.523  | $\pm 7/2$  |
| 6           | 310.4              | 7.487<br>7.471<br>2.703  | $\pm 3/2$  | 435.3              | 7.672<br>7.650<br>2.197  | $\pm 3/2$  | 532.7              | 7.136<br>7.120<br>2.914  | $\pm 3/2$  |
| 7           | 405.0              | 0.009<br>0.094<br>3.547  | $\pm 7/2$  | 519.8              | 0.007<br>0.089<br>2.779  | $\pm 5/2$  | 620.4              | 0.019<br>0.081<br>3.007  | $\pm 5/2$  |
| 8           | 469.6              | 8.954<br>8.875<br>1.372  | $\pm 1/2$  | 583.4              | 9.331<br>9.214<br>0.975  | $\pm 1/2$  | 683.5              | 9.478<br>9.351<br>1.013  | $\pm 1/2$  |
| Er-C<br>KDs | 2.10 Å             |                          |            | 2.20 Å             |                          |            | 2.30 Å             |                          |            |
|             | $E/\text{cm}^{-1}$ | $\mathbf{g}$             | $m_J$      | $E/\text{cm}^{-1}$ | $\mathbf{g}$             | $m_J$      | $E/\text{cm}^{-1}$ | $\mathbf{g}$             | $m_J$      |
| 1           | 0.0                | 0.000<br>0.000<br>17.817 | $\pm 15/2$ | 0.0                | 0.000<br>0.000<br>17.868 | $\pm 15/2$ | 0.0                | 0.000<br>0.000<br>17.897 | $\pm 15/2$ |
| 2           | 229.1              | 0.533<br>0.534           | $\pm 13/2$ | 227.7              | 0.358<br>0.358           | $\pm 13/2$ | 218.5              | 0.260<br>0.261           | $\pm 13/2$ |

|      |                    |                          |            |                    |                          |            |                    |                          |            |  |
|------|--------------------|--------------------------|------------|--------------------|--------------------------|------------|--------------------|--------------------------|------------|--|
|      |                    | 15.284                   |            |                    | 15.387                   |            |                    | 15.437                   |            |  |
| 3    | 299.6              | 0.460<br>0.461<br>12.885 | $\pm 11/2$ | 308.2              | 0.303<br>0.305<br>12.964 | $\pm 11/2$ | 304.8              | 0.217<br>0.218<br>13.007 | $\pm 11/2$ |  |
| 4    | 349.2              | 0.000<br>0.015<br>10.266 | $\pm 9/2$  | 367.4              | 0.001<br>0.013<br>10.349 | $\pm 9/2$  | 370.3              | 0.002<br>0.011<br>10.408 | $\pm 9/2$  |  |
| 5    | 414.2              | 6.736<br>6.710<br>5.854  | $\pm 7/2$  | 439.4              | 6.488<br>6.467<br>6.084  | $\pm 7/2$  | 445.5              | 6.237<br>6.255<br>6.281  | $\pm 7/2$  |  |
| 6    | 582.0              | 6.746<br>6.736<br>3.366  | $\pm 5/2$  | 597.4              | 6.480<br>6.475<br>3.639  | $\pm 5/2$  | 591.5              | 6.243<br>6.241<br>3.856  | $\pm 5/2$  |  |
| 7    | 670.1              | 0.027<br>0.073<br>3.111  | $\pm 3/2$  | 682.6              | 0.033<br>0.068<br>3.170  | $\pm 3/2$  | 672.0              | 0.036<br>0.065<br>3.220  | $\pm 3/2$  |  |
| 8    | 731.1              | 9.532<br>9.406<br>1.055  | $\pm 1/2$  | 740.0              | 9.558<br>9.434<br>1.082  | $\pm 1/2$  | 725.1              | 9.574<br>9.452<br>1.102  | $\pm 1/2$  |  |
| Er-C |                    | 2.40 Å                   |            |                    | 2.50 Å                   |            |                    | 2.60 Å                   |            |  |
| KDs  | $E/\text{cm}^{-1}$ | <b>g</b>                 | $m_J$      | $E/\text{cm}^{-1}$ | <b>g</b>                 | $m_J$      | $E/\text{cm}^{-1}$ | <b>g</b>                 | $m_J$      |  |
| 1    | 0.0                | 0.000<br>0.000<br>17.914 | $\pm 15/2$ | 0.0                | 0.000<br>0.000<br>17.926 | $\pm 15/2$ | 0.0                | 0.000<br>0.000<br>17.934 | $\pm 15/2$ |  |
| 2    | 205.7              | 0.195<br>0.196<br>15.468 | $\pm 13/2$ | 191.7              | 0.149<br>0.149<br>15.489 | $\pm 13/2$ | 177.9              | 0.114<br>0.114<br>15.503 | $\pm 13/2$ |  |
| 3    | 295.0              | 0.160<br>0.161<br>13.037 | $\pm 11/2$ | 281.9              | 0.120<br>0.121<br>13.060 | $\pm 11/2$ | 267.6              | 0.090<br>0.091<br>13.078 | $\pm 11/2$ |  |
| 4    | 364.3              | 0.003<br>0.010<br>10.459 | $\pm 9/2$  | 353.3              | 0.003<br>0.009<br>10.504 | $\pm 9/2$  | 339.7              | 0.003<br>0.007<br>10.545 | $\pm 9/2$  |  |
| 5    | 440.4              | 5.993<br>6.008<br>6.473  | $\pm 7/2$  | 428.7              | 5.725<br>5.738<br>6.665  | $\pm 7/2$  | 413.6              | 5.434<br>5.445<br>6.857  | $\pm 7/2$  |  |
| 6    | 573.2              | 5.996<br>5.994<br>4.059  | $\pm 5/2$  | 548.5              | 5.727<br>5.725<br>4.258  | $\pm 5/2$  | 521.2              | 5.436<br>5.434<br>4.453  | $\pm 5/2$  |  |
| 7    | 648.5              | 0.039<br>0.063<br>3.267  | $\pm 3/2$  | 618.5              | 0.043<br>0.063<br>3.313  | $\pm 3/2$  | 586.1              | 0.044<br>0.061<br>3.355  | $\pm 3/2$  |  |
| 8    | 697.1              | 9.586<br>9.465           | $\pm 1/2$  | 662.7              | 9.596<br>9.475           | $\pm 1/2$  | 626.3              | 9.602<br>9.483           | $\pm 1/2$  |  |

|             |                    |                          |            |  |       |  |  |       |  |
|-------------|--------------------|--------------------------|------------|--|-------|--|--|-------|--|
|             |                    | 1.117                    |            |  | 1.130 |  |  | 1.141 |  |
| Er-C<br>KDs | 2.70 Å             |                          |            |  |       |  |  |       |  |
|             | $E/\text{cm}^{-1}$ | $g$                      | $m_J$      |  |       |  |  |       |  |
| 1           | 0.0                | 0.000<br>0.000<br>17.939 | $\pm 15/2$ |  |       |  |  |       |  |
| 2           | 164.9              | 0.087<br>0.087<br>15.515 | $\pm 13/2$ |  |       |  |  |       |  |
| 3           | 253.3              | 0.068<br>0.069<br>13.093 | $\pm 11/2$ |  |       |  |  |       |  |
| 4           | 325.1              | 0.003<br>0.006<br>10.580 | $\pm 9/2$  |  |       |  |  |       |  |
| 5           | 396.9              | 5.121<br>5.131<br>7.044  | $\pm 7/2$  |  |       |  |  |       |  |
| 6           | 493.6              | 5.123<br>5.121<br>4.643  | $\pm 5/2$  |  |       |  |  |       |  |
| 7           | 553.6              | 0.045<br>0.060<br>3.393  | $\pm 3/2$  |  |       |  |  |       |  |
| 8           | 590.1              | 9.608<br>9.490<br>1.150  | $\pm 1/2$  |  |       |  |  |       |  |

**Table S15.** Wave functions with definite projection of the total moments  $|m_J\rangle$  for the lowest two KDs for **3** with the different Er-C bond lengths (Å) keeping the  $\theta$  of  $90^\circ$  using CASSCF/RASSI-SO with MOLCAS 8.4.

| $\theta$ | $E/\text{cm}^{-1}$ | wave functions                                                                                      |
|----------|--------------------|-----------------------------------------------------------------------------------------------------|
| 1.80 Å   | 0.0                | $58.67\% \pm 15/2\rangle + 41.64\% \pm 9/2\rangle$                                                  |
|          | 44.0               | $11.27\% \pm 13/2\rangle + 48.17\% \pm 7/2\rangle + 28.29\% \pm 5/2\rangle + 7.31\% \pm 1/2\rangle$ |
| 1.90 Å   | 0.0                | $93.26\% \pm 15/2\rangle + 6.39\% \pm 9/2\rangle$                                                   |
|          | 170.5              | $77.23\% \pm 13/2\rangle + 12.52\% \pm 7/2\rangle$                                                  |
| 2.00 Å   | 0.0                | $97.98\% \pm 15/2\rangle$                                                                           |
|          | 215.2              | $95.73\% \pm 13/2\rangle$                                                                           |
| 2.10 Å   | 0.0                | $99.12\% \pm 15/2\rangle$                                                                           |
|          | 229.1              | $98.27\% \pm 13/2\rangle$                                                                           |
| 2.20 Å   | 0.0                | $99.55\% \pm 15/2\rangle$                                                                           |
|          | 227.7              | $99.06\% \pm 13/2\rangle$                                                                           |
| 2.30 Å   | 0.0                | $99.74\% \pm 15/2\rangle$                                                                           |
|          | 218.5              | $99.40\% \pm 13/2\rangle$                                                                           |

|        |       |               |
|--------|-------|---------------|
| 2.40 Å | 0.0   | 99.84% ±15/2> |
|        | 205.7 | 99.59% ±13/2> |
| 2.50 Å | 0.0   | 99.89% ±15/2> |
|        | 191.7 | 99.70% ±13/2> |
| 2.60 Å | 0.0   | 99.92% ±15/2> |
|        | 177.9 | 99.77% ±13/2> |
| 2.70 Å | 0.0   | 99.94% ±15/2> |
|        | 164.9 | 99.82% ±13/2> |

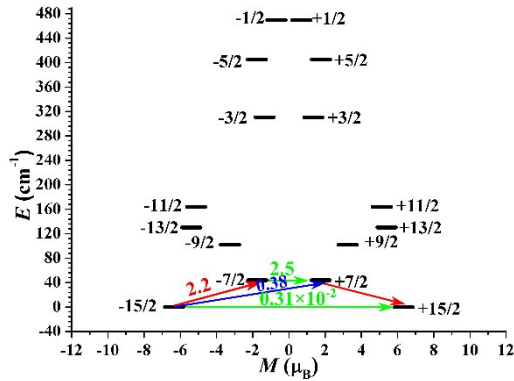

1.80 Å

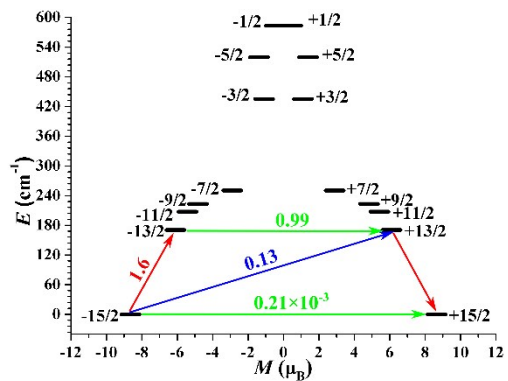

1.90 Å

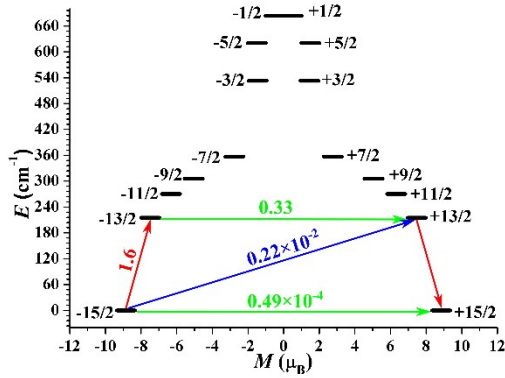

2.00 Å

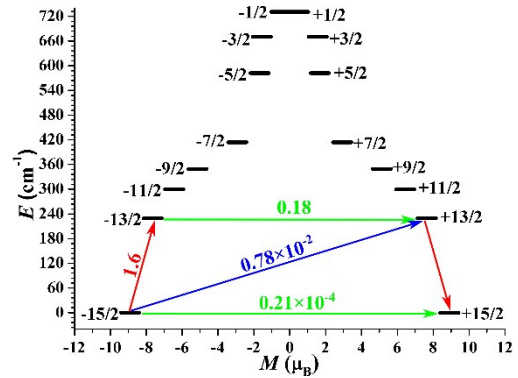

2.10 Å

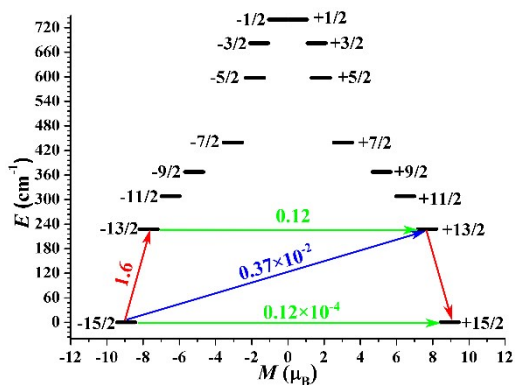

2.20 Å

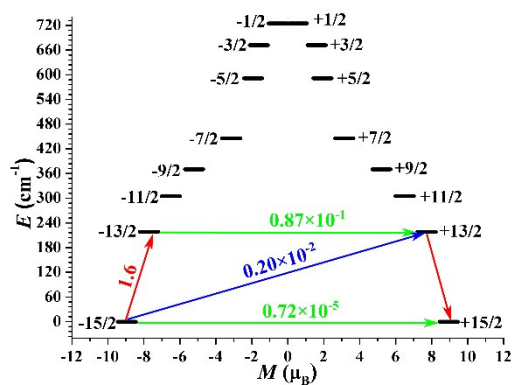

2.30 Å

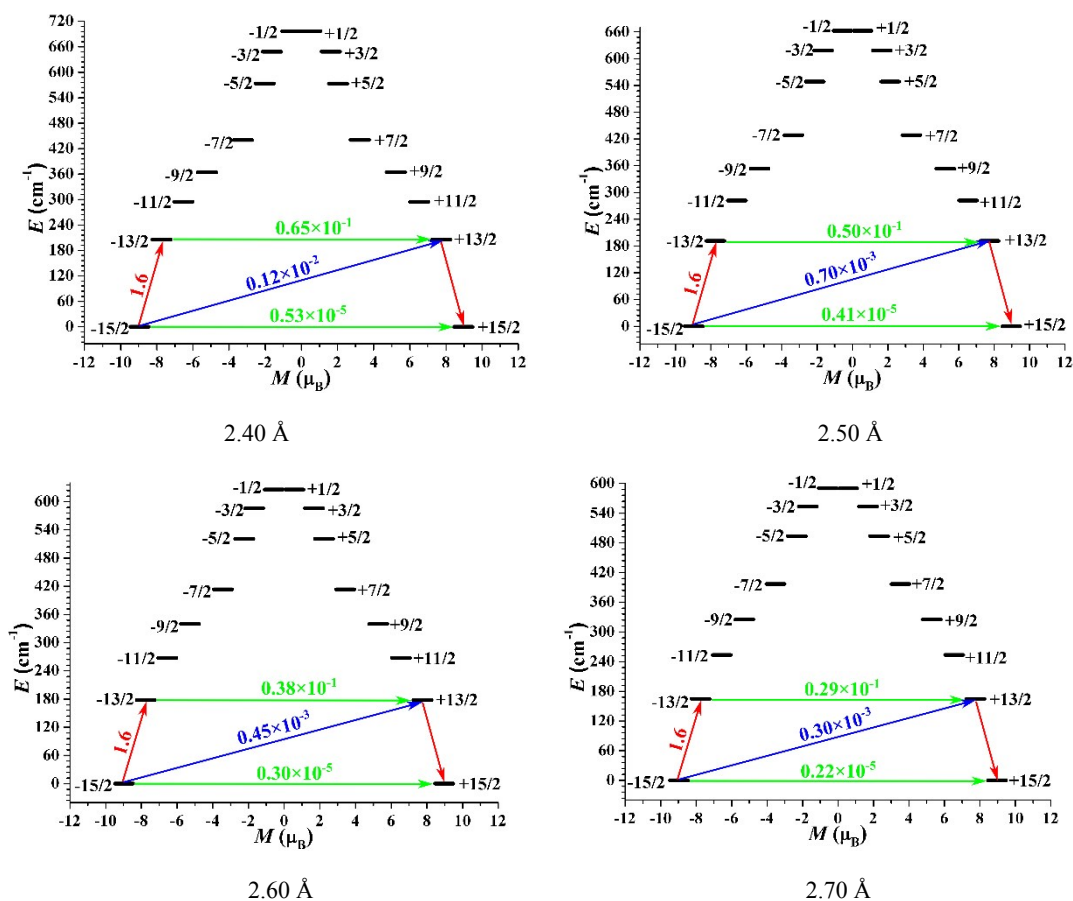

**Figure S7.** Magnetization blocking barriers for **3** with the different Er-C bond lengths keeping the  $\theta$  of  $90^\circ$ . The thick black lines represent the KDs as a function of their magnetic moments along the magnetic axes. The green lines correspond to diagonal matrix elements of their transversal magnetic moments; the blue lines represent Orbach relaxation processes. The path shown by the red arrows represent the most probable path for magnetic relaxation in the corresponding compounds. The numbers at each arrow stand for the mean absolute value of the corresponding matrix element of transition magnetic moment.

**Table S16.** Calculated energy levels ( $\text{cm}^{-1}$ ),  $\mathbf{g}$  ( $g_x, g_y, g_z$ ) tensors and predominant  $m_J$  values of the lowest eight KDs for simple model  $\text{Er}(\text{NH}_2)_3$  with the different Er-N bond lengths ( $\text{\AA}$ ) keeping the  $\theta$  of  $90^\circ$  using CASSCF/RASSI-SO with MOLCAS 8.4.

| Er-N<br>KDs | 1.80 $\text{\AA}$  |                          |            | 1.90 $\text{\AA}$  |                          |            | 2.00 $\text{\AA}$  |                          |            |
|-------------|--------------------|--------------------------|------------|--------------------|--------------------------|------------|--------------------|--------------------------|------------|
|             | $E/\text{cm}^{-1}$ | $\mathbf{g}$             | $m_J$      | $E/\text{cm}^{-1}$ | $\mathbf{g}$             | $m_J$      | $E/\text{cm}^{-1}$ | $\mathbf{g}$             | $m_J$      |
| 1           | 0.0                | 1.871<br>5.114<br>12.143 | $\pm 15/2$ | 0.0                | 0.040<br>0.090<br>17.623 | $\pm 15/2$ | 0.0                | 0.006<br>0.012<br>17.801 | $\pm 15/2$ |
| 2           | 41.0               | 0.238<br>4.280<br>11.954 | $\pm 13/2$ | 162.9              | 1.315<br>4.829<br>12.982 | $\pm 11/2$ | 221.3              | 0.111<br>0.270<br>15.337 | $\pm 13/2$ |
| 3           | 78.3               | 5.286<br>3.059<br>0.704  | $\pm 7/2$  | 191.4              | 1.085<br>3.266<br>8.978  | $\pm 9/2$  | 261.9              | 1.171<br>1.381<br>11.924 | $\pm 11/2$ |

|             |                    |                          |            |                    |                          |            |                    |                          |            |
|-------------|--------------------|--------------------------|------------|--------------------|--------------------------|------------|--------------------|--------------------------|------------|
| 4           | 186.1              | 0.069<br>2.692<br>10.436 | $\pm 9/2$  | 260.4              | 2.120<br>5.233<br>9.356  | $\pm 7/2$  | 315.5              | 2.704<br>3.504<br>10.951 | $\pm 9/2$  |
| 5           | 352.1              | 0.580<br>1.333<br>14.926 | $\pm 11/2$ | 330.3              | 1.188<br>1.451<br>15.692 | $\pm 13/2$ | 375.2              | 3.068<br>3.890<br>11.907 | $\pm 7/2$  |
| 6           | 399.2              | 2.119<br>4.410<br>10.321 | $\pm 3/2$  | 512.7              | 2.556<br>4.637<br>10.044 | $\pm 3/2$  | 587.8              | 2.921<br>4.747<br>9.435  | $\pm 5/2$  |
| 7           | 555.6              | 0.017<br>2.934<br>6.596  | $\pm 1/2$  | 643.8              | 0.319<br>2.656<br>5.811  | $\pm 5/2$  | 701.3              | 0.474<br>2.756<br>5.153  | $\pm 3/2$  |
| 8           | 663.4              | 0.934<br>5.911<br>12.368 | $\pm 5/2$  | 739.7              | 0.926<br>6.222<br>12.321 | $\pm 1/2$  | 782.8              | 0.955<br>6.547<br>12.143 | $\pm 1/2$  |
| Er-N<br>KDs | 2.10 Å             |                          |            | 2.20 Å             |                          |            | 2.30 Å             |                          |            |
|             | $E/\text{cm}^{-1}$ | <b><i>g</i></b>          | $m_J$      | $E/\text{cm}^{-1}$ | <b><i>g</i></b>          | $m_J$      | $E/\text{cm}^{-1}$ | <b><i>g</i></b>          | $m_J$      |
| 1           | 0.0                | 0.001<br>0.003<br>17.861 | $\pm 15/2$ | 0.0                | 0.000<br>0.001<br>17.892 | $\pm 15/2$ | 0.0                | 0.000<br>0.001<br>17.912 | $\pm 15/2$ |
| 2           | 224.2              | 0.335<br>0.455<br>15.353 | $\pm 13/2$ | 213.3              | 0.275<br>0.324<br>15.410 | $\pm 13/2$ | 199.3              | 0.197<br>0.219<br>15.453 | $\pm 13/2$ |
| 3           | 291.2              | 0.108<br>0.805<br>12.663 | $\pm 11/2$ | 297.6              | 0.048<br>0.471<br>12.867 | $\pm 11/2$ | 294.0              | 0.053<br>0.294<br>12.962 | $\pm 11/2$ |
| 4           | 348.2              | 2.002<br>2.534<br>10.290 | $\pm 9/2$  | 367.2              | 1.419<br>1.738<br>10.211 | $\pm 9/2$  | 372.7              | 1.020<br>1.213<br>10.312 | $\pm 9/2$  |
| 5           | 423.7              | 4.406<br>5.136<br>9.502  | $\pm 7/2$  | 449.2              | 4.956<br>5.688<br>8.285  | $\pm 7/2$  | 457.1              | 5.136<br>6.065<br>7.453  | $\pm 7/2$  |
| 6           | 618.1              | 3.217<br>4.801<br>8.894  | $\pm 5/2$  | 620.3              | 3.503<br>4.795<br>8.354  | $\pm 5/2$  | 606.3              | 3.791<br>4.731<br>7.792  | $\pm 5/2$  |
| 7           | 717.6              | 4.653<br>2.875<br>0.605  | $\pm 3/2$  | 708.4              | 4.280<br>2.986<br>0.778  | $\pm 3/2$  | 685.1              | 4.025<br>3.081<br>1.015  | $\pm 3/2$  |
| 8           | 787.0              | 12.008<br>6.778<br>0.987 | $\pm 1/2$  | 768.3              | 11.942<br>6.907<br>1.016 | $\pm 1/2$  | 737.3              | 11.956<br>6.933<br>1.037 | $\pm 1/2$  |
| Er-N<br>KDs | 2.40 Å             |                          |            | 2.50 Å             |                          |            | 2.60 Å             |                          |            |
|             | $E/\text{cm}^{-1}$ | <b><i>g</i></b>          | $m_J$      | $E/\text{cm}^{-1}$ | <b><i>g</i></b>          | $m_J$      | $E/\text{cm}^{-1}$ | <b><i>g</i></b>          | $m_J$      |
| 1           | 0.0                | 0.000                    | $\pm 15/2$ | 0.0                | 0.000                    | $\pm 15/2$ | 0.0                | 0.000                    | $\pm 15/2$ |

|      |                    |                          |            |       |                          |            |       |                          |            |
|------|--------------------|--------------------------|------------|-------|--------------------------|------------|-------|--------------------------|------------|
|      |                    | 0.001<br>17.924          |            |       | 0.000<br>17.933          |            |       | 0.000<br>17.940          |            |
| 2    | 185.2              | 0.139<br>0.151<br>15.482 | $\pm 13/2$ | 172.0 | 0.100<br>0.106<br>15.501 | $\pm 13/2$ | 160.1 | 0.072<br>0.076<br>15.515 | $\pm 13/2$ |
| 3    | 285.2              | 0.041<br>0.194<br>13.018 | $\pm 11/2$ | 274.0 | 0.030<br>0.132<br>13.055 | $\pm 11/2$ | 261.8 | 0.022<br>0.093<br>13.081 | $\pm 11/2$ |
| 4    | 369.2              | 0.749<br>0.873<br>10.410 | $\pm 9/2$  | 360.1 | 0.563<br>0.645<br>10.489 | $\pm 9/2$  | 348.1 | 0.432<br>0.489<br>10.550 | $\pm 9/2$  |
| 5    | 453.6              | 6.844<br>6.316<br>5.106  | $\pm 7/2$  | 443.3 | 6.795<br>6.054<br>4.943  | $\pm 7/2$  | 429.1 | 4.693<br>5.537<br>7.021  | $\pm 7/2$  |
| 6    | 583.7              | 4.073<br>4.612<br>7.213  | $\pm 5/2$  | 557.3 | 4.315<br>4.468<br>6.625  | $\pm 5/2$  | 529.8 | 4.204<br>4.618<br>6.037  | $\pm 5/2$  |
| 7    | 654.9              | 3.869<br>3.160<br>1.300  | $\pm 3/2$  | 622.1 | 3.789<br>3.221<br>1.610  | $\pm 3/2$  | 589.0 | 3.763<br>3.268<br>1.928  | $\pm 3/2$  |
| 8    | 701.0              | 12.033<br>6.877<br>1.051 | $\pm 1/2$  | 663.2 | 12.152<br>6.763<br>1.058 | $\pm 1/2$  | 626.1 | 1.059<br>6.614<br>12.297 | $\pm 1/2$  |
| Er-N | 2.70 Å             |                          |            |       |                          |            |       |                          |            |
| KDs  | $E/\text{cm}^{-1}$ | $g$                      | $m_J$      |       |                          |            |       |                          |            |
| 1    | 0.0                | 0.000<br>0.000<br>17.944 | $\pm 15/2$ |       |                          |            |       |                          |            |
| 2    | 149.3              | 0.053<br>0.055<br>15.524 | $\pm 13/2$ |       |                          |            |       |                          |            |
| 3    | 249.4              | 0.016<br>0.066<br>13.099 | $\pm 11/2$ |       |                          |            |       |                          |            |
| 4    | 334.6              | 0.340<br>0.379<br>10.596 | $\pm 9/2$  |       |                          |            |       |                          |            |
| 5    | 412.9              | 4.391<br>5.030<br>7.243  | $\pm 7/2$  |       |                          |            |       |                          |            |
| 6    | 502.6              | 5.461<br>4.840<br>3.967  | $\pm 5/2$  |       |                          |            |       |                          |            |
| 7    | 557.1              | 3.771                    | $\pm 3/2$  |       |                          |            |       |                          |            |

|   |       |        |           |
|---|-------|--------|-----------|
|   |       | 3.302  |           |
|   |       | 2.234  |           |
| 8 | 590.7 | 1.057  | $\pm 1/2$ |
|   |       | 6.450  |           |
|   |       | 12.449 |           |

**Table S17.** Wave functions with definite projection of the total moments  $|m_J\rangle$  for the lowest two KDs for simple model  $\text{Er}(\text{NH}_2)_3$  with the different Er-N bond lengths ( $\text{\AA}$ ) keeping the  $\theta$  of  $90^\circ$  using CASSCF/RASSI-SO with MOLCAS 8.4.

| Er-N              | $E/\text{cm}^{-1}$ | wave functions                                                                                        |
|-------------------|--------------------|-------------------------------------------------------------------------------------------------------|
| 1.80 $\text{\AA}$ | 0.0                | $60.43\% \pm 15/2\rangle + 24.57\% \pm 13/2\rangle$                                                   |
|                   | 41.0               | $32.02\% \pm 15/2\rangle + 26.43\% \pm 13/2\rangle + 10.74\% \pm 9/2\rangle + 10.85\% \pm 7/2\rangle$ |
| 1.90 $\text{\AA}$ | 0.0                | $98.10\% \pm 15/2\rangle$                                                                             |
|                   | 162.9              | $14.94\% \pm 13/2\rangle + 48.40\% \pm 11/2\rangle + 22.97\% \pm 9/2\rangle$                          |
| 2.00 $\text{\AA}$ | 0.0                | $99.47\% \pm 15/2\rangle$                                                                             |
|                   | 221.3              | $73.59\% \pm 13/2\rangle + 22.40\% \pm 11/2\rangle$                                                   |
| 2.10 $\text{\AA}$ | 0.0                | $99.76\% \pm 15/2\rangle$                                                                             |
|                   | 224.2              | $93.65\% \pm 13/2\rangle$                                                                             |
| 2.20 $\text{\AA}$ | 0.0                | $99.86\% \pm 15/2\rangle$                                                                             |
|                   | 213.3              | $97.90\% \pm 13/2\rangle$                                                                             |
| 2.30 $\text{\AA}$ | 0.0                | $99.91\% \pm 15/2\rangle$                                                                             |
|                   | 199.3              | $99.08\% \pm 13/2\rangle$                                                                             |
| 2.40 $\text{\AA}$ | 0.0                | $99.94\% \pm 15/2\rangle$                                                                             |
|                   | 185.2              | $99.51\% \pm 13/2\rangle$                                                                             |
| 2.50 $\text{\AA}$ | 0.0                | $99.96\% \pm 15/2\rangle$                                                                             |
|                   | 172.0              | $99.70\% \pm 13/2\rangle$                                                                             |
| 2.60 $\text{\AA}$ | 0.0                | $99.97\% \pm 15/2\rangle$                                                                             |
|                   | 160.1              | $99.81\% \pm 13/2\rangle$                                                                             |
| 2.70 $\text{\AA}$ | 0.0                | $99.98\% \pm 15/2\rangle$                                                                             |
|                   | 149.3              | $99.87\% \pm 13/2\rangle$                                                                             |

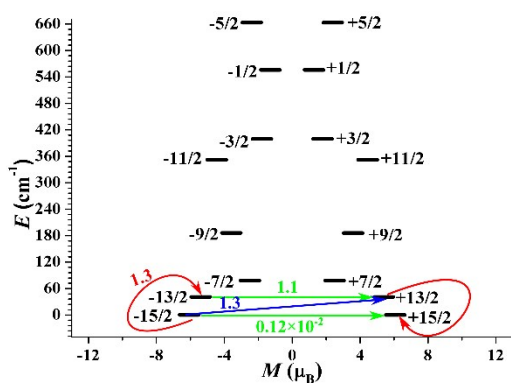

1.80  $\text{\AA}$

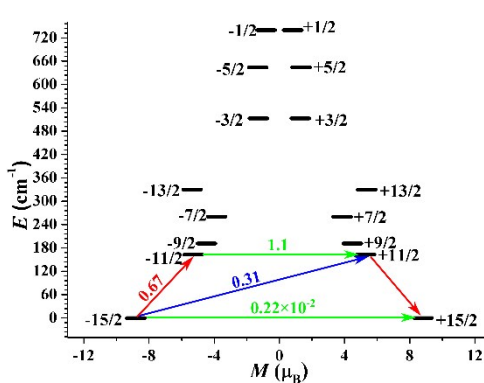

1.90  $\text{\AA}$



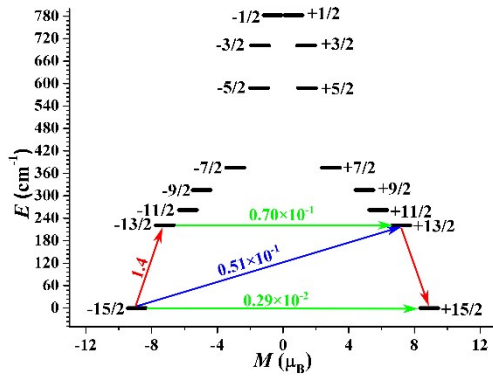

2.00 Å

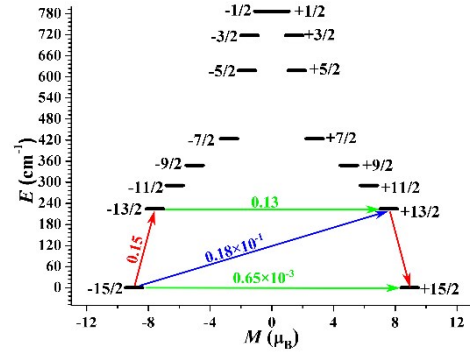

2.10 Å

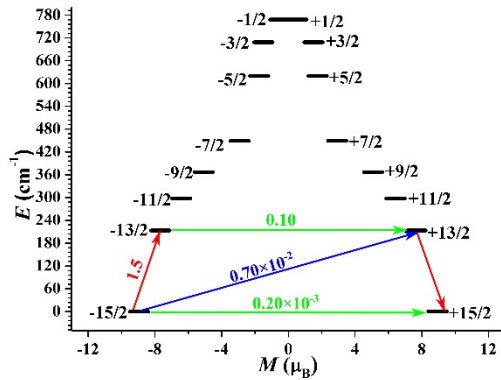

2.20 Å

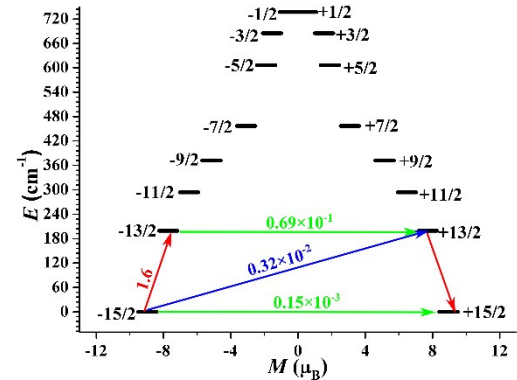

2.30 Å

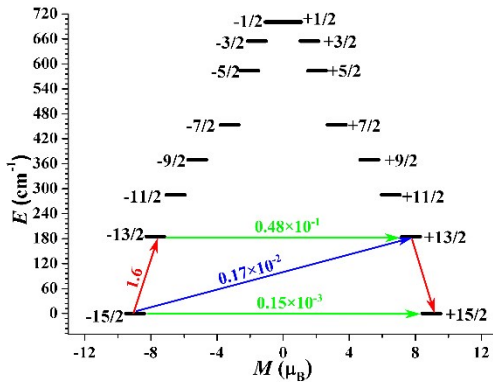

2.40 Å

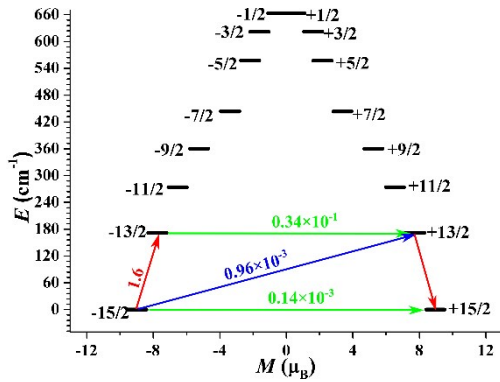

2.50 Å

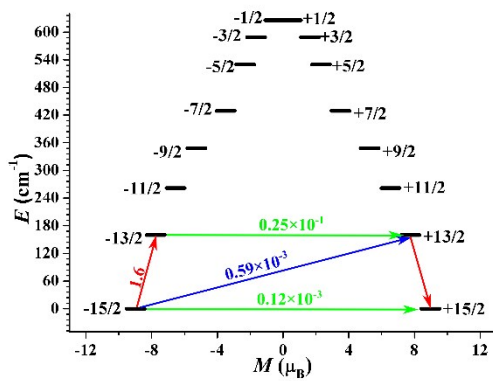

2.60 Å

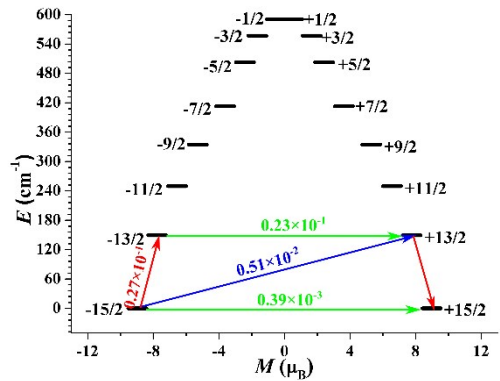

2.70 Å

**Figure S8.** Magnetization blocking barriers for model  $\text{Er}(\text{NH}_2)_3$  with the different Er-N bond lengths keeping the  $\theta$  of  $90^\circ$ . The thick black lines represent the KDs as a function of their magnetic moments along the magnetic axes. The green lines correspond to diagonal matrix elements of their transversal magnetic moments; the blue lines represent Orbach relaxation processes. The path shown by the red arrows represent the most probable path for magnetic relaxation in the corresponding compounds. The numbers at each arrow stand for the mean absolute value of the corresponding matrix element of transition magnetic moment.
